# Supplementary material for: Clinical efficacy and safety in patients treated with teicoplanin with a target trough concentration of 20 μg/mL using a regimen of 12 mg/kg for five doses within the initial 3 days
Source: BMC Pharmacol Toxicol. 2020 Jul 8;21:50. doi: 10.1186/s40360-020-00424-3 (PMC7341468; doi:10.1186/s40360-020-00424-3)
Supplement: Supplementary file 2 — Additional file 2. [file 40360_2020_424_MOESM2_ESM.xlsx]

## Sheet: Availability data
No	Enhanced high loading regimen	Sex male	Age) (years)	Body weight (range) (kg)	Body mass index	Serum albumin (g/dL)	Estimated glomerular filtration rate (mL/min/1.73m2)	The total dose for the initial 3 days (mg/kg)	Daily maintenance dose after day 4 (mg/kg)	Teicoplanin initial Cmin(μg/mL)	Teicoplanin max Cmin (μg/mL)	Heart disease	Chronic renal failure	Diabetes mellitus	Collagen disease	Chronic respiratory disease	Inflammatory bowel disease	ICU stay (>3days)	Liver cirrhosis/chronic hepatic dysfunction	Malignant tumor	Total parenteral nutrition	Ventilator use	Surgery within 28 days	Transplantation	Steroid use	Immunosuppressive therapy	Anticancer therapy	MRSA infections	Complicated MRSA infections	APACHE II score 15以上	Blood stream	Respiratory	Intraabdominal	Skin & soft tissue	Osteomyelitis and arthritis	Urinary tract	Sinusitis	Mediastinitis	Central nervous system	clinical efficacy population	Nephrotoxicity on the 4th day	Nephrotoxicity at the end of therapy	Hepatotoxicity on the 4th day	Hepatotoxicity at the end of therapy	Early clinical response	Clinical success at the end of therapy	28 days mortality	MRSA	MSSA
1	0	1	74	64.2	22.2145	2.4	38	31.1526	4.6729	23.7	23.7	1	1	1	0	0	0	0	0	0	0	0	0	0	0	0	0	0	0	1	1	0	0	0	0	0	0	0	0	0	0	0	0	0	1	1	0	0	0
2	0	0	67	54	23.6832	3.4	56	44.4444	3.7037	11	11	0	0	1	0	0	0	0	0	1	1	0	1	0	0	0	0	0	0	1	1	0	0	0	0	0	0	0	0	0	0	0	0	0	1	1	0	0	0
3	0	1	83	58	21.83	2.9	20	34.4828	5.17241	20	20	1	1	0	0	0	0	0	0	1	0	0	0	0	0	0	0	0	0	0	1	0	0	0	0	0	0	0	0	0	0	0	0	0	1	1	0	0	0
4	0	1	67	61.9	22.7365	2.6	43	38.7722	3.23102	26.6	26.6	0	0	0	0	0	0	0	0	1	0	0	0	0	0	0	0	1	1	0	0	0	0	0	1	0	0	0	0	1	0	0	0	0	0	0	0	1	0
5	0	1	70	59.1	23.6143	2.8	23	33.8409	5.07614	11	11	1	1	0	0	0	0	0	0	1	0	0	1	0	0	0	0	0	0	0	0	0	0	0	0	0	0	0	0	0	0	0	0	0	1	1	1	0	0
6	0	1	61	66.6	21.9976	3.1	52	36.036	3.003	29.8	29.8	0	0	0	0	0	0	0	0	0	0	0	1	0	0	0	0	0	0	0	0	0	0	0	1	0	0	0	0	0	0	0	0	0	1	1	0	0	1
7	0	1	65	57.2	21.2671	2.6	43	41.958	3.4965	21.6	22.8	1	1	0	0	0	0	0	1	1	0	0	0	0	0	0	0	0	0	0	0	0	0	0	0	0	0	0	0	0	0	0	0	0	1	1	0	1	0
8	0	1	62	65	23.5883	2.1	15	30.7692	4.61538	13.1	13.1	0	1	0	0	0	1	0	0	0	0	0	0	0	1	0	0	0	0	1	1	0	0	0	0	0	0	0	0	0	0	0	0	0	1	1	0	0	0
9	0	1	77	69.9	24.8548	1.8	51	34.3348	3.57654	17.5	26.3	0	0	0	0	1	0	0	0	1	0	0	0	0	0	0	0	1	1	0	0	1	0	0	0	0	0	0	0	1	0	0	0	0	0	1	0	1	0
10	0	0	72	55.2	23.8606	2.6	43	43.4783	3.62319	17.5	17.5	0	0	0	0	0	0	0	1	1	0	0	0	0	0	0	1	0	0	0	0	0	1	0	0	0	0	0	0	0	0	0	0	0	1	1	0	0	0
11	0	1	81	53.4	19.8543	1.9	56	44.9438	3.74532	20	20	0	0	1	0	0	0	0	0	1	0	0	0	0	0	0	1	1	1	0	0	1	0	0	0	0	0	0	0	1	0	0	0	0	1	1	0	1	0
12	0	1	76	62	27.1918	3.2	36	32.2581	4.83871	11.3	11.3	1	0	0	0	0	0	0	0	0	0	0	1	0	0	0	0	0	0	0	0	0	0	0	0	0	0	0	0	0	0	0	0	0	0	0	0	0	0
13	0	0	87	43.8	19.9963	2.4	43	36.5297	3.42466	23.7	23.7	1	0	0	0	0	0	0	0	0	0	0	0	0	0	0	0	1	0	0	0	0	0	1	0	0	0	0	0	0	0	0	0	0	1	1	0	1	0
14	0	0	82	43.7	19.4222	2.5	50	36.6133	3.43249	23	23	1	0	0	0	0	0	0	0	0	0	0	1	0	0	0	0	0	0	0	1	0	0	0	0	0	0	0	0	0	0	0	0	0	1	1	0	0	0
15	0	0	80	46.1	18.235	3.7	38	34.7072	5.42299	14.1	14.1	1	1	0	0	0	0	0	0	0	0	0	0	0	0	0	0	0	0	0	1	0	0	0	0	0	0	0	0	0	0	0	0	0	1	1	0	0	0
16	0	0	84	36.6	18.024	2.7	57	43.7158	4.09836	17.7	17.7	0	0	0	0	0	0	0	0	0	0	0	0	0	0	0	0	1	1	0	1	0	0	0	0	1	0	0	0	1	0	0	0	0	1	1	0	1	0
17	0	1	74	45.6	18.9802	3.1	67	43.8596	6.57895	22.9	22.9	1	0	1	0	0	0	0	0	1	0	0	0	0	0	0	0	0	0	0	1	0	0	0	0	0	0	0	0	0	0	0	0	0	0	1	0	0	0
18	0	1	73	42.1	17.0581	2.5	99	47.5059	7.12589	20.2	42	0	0	0	0	0	0	0	0	1	0	0	0	0	1	0	0	1	0	1	0	0	0	1	0	0	0	0	0	0	0	0	0	0	1	0	1	1	0
19	0	0	83	38.8	18.4542	2.4	92	51.5464	6.4433	17.4	17.4	1	0	0	0	0	0	0	0	1	0	0	0	0	0	0	0	0	0	0	0	0	1	0	0	0	0	0	0	0	0	0	0	0	0	1	0	0	0
20	0	1	21	44.1	15.386	2.9	169	45.3515	6.80272	16.9	16.9	0	0	0	0	0	1	0	0	0	0	0	1	0	0	0	0	1	0	0	0	0	0	1	0	0	0	0	0	0	0	0	0	0	1	1	0	1	0
21	0	0	51	62.5	24.4141	3	70	48	6.4	29.6	29.6	0	0	1	1	1	0	1	0	0	0	1	0	0	1	0	0	1	1	1	0	1	0	0	0	0	0	0	0	1	0	0	0	0	1	1	0	1	0
22	0	1	33	55	21.192	3.1	84	54.5455	7.27273	20.9	20.9	0	0	0	0	0	1	0	0	0	1	0	0	0	0	0	0	0	0	0	1	0	0	0	0	0	0	0	0	0	0	0	0	0	1	1	0	0	0
23	0	1	73	62.2	23.2393	3.3	85	48.2315	6.43087	25.8	25.8	0	0	0	0	0	0	0	0	0	0	0	0	0	0	0	0	0	0	0	0	0	0	0	0	0	0	0	0	0	0	0	0	0	-	-	0	1	0
24	0	0	68	54.8	24.5187	2.9	38	36.4964	5.47445	25.4	25.4	0	1	0	0	0	0	0	1	0	0	0	0	0	0	0	0	0	0	0	0	0	0	0	0	0	0	0	0	0	0	0	0	0	-	-	0	1	0
25	0	0	79	55.3	27.8155	2.6	77	54.2495	7.23327	21.6	24.3	0	0	0	0	0	0	0	1	0	0	0	0	0	0	0	0	0	0	0	0	0	0	0	0	0	0	0	0	0	0	0	0	0	1	1	0	0	0
26	0	1	76	71.6	30.1906	3.5	54	41.8994	3.49162	30.8	30.8	1	0	0	0	0	0	0	0	0	0	0	1	0	0	0	0	0	0	0	0	0	0	0	0	0	0	0	0	0	0	0	0	0	1	1		0	0
27	0	1	73	63	22.3214	2.2	91	47.619	6.34921	18.1	18.1	0	0	0	0	0	0	0	0	1	0	0	1	0	0	0	0	1	1	0	0	1	0	0	0	0	0	0	0	1	0	0	0	0	1	1	0	1	0
28	0	1	60	59.9	22.0018	2.4	111	50.0835	6.6778	7.9	7.9	0	0	0	0	0	0	1	0	1	0	0	1	0	0	0	0	0	0	1	1	0	0	0	0	0	0	0	0	0	0	0	0	0	1	1	0	0	0
29	0	1	62	57	19.4932	2.1	76	52.6316	7.01754	13.2	13.2	0	0	0	0	0	0	1	0	1	1	1	0	0	1	0	0	1	1	1	1	1	0	0	0	0	0	0	0	1	0	1	0	0	1	1	0	1	0
30	0	0	70	59.8	26.7559	3.9	67	50.1672	6.68896	32.8	32.8	0	0	0	0	0	0	0	0	0	0	0	0	0	0	0	0	0	0	0	0	0	0	0	0	0	0	0	0	0	0	0	0	0	-	-	0	1	0
31	0	0	65	55	22.0317	4.8	84	54.5455	6.36364	29.7	38.8	0	0	0	0	0	0	0	0	0	0	0	0	0	0	0	0	0	0	0	0	0	0	0	0	0	0	0	0	0	0	0	0	0	-	-	0	1	0
32	0	0	81	45.9	20.9551	2.4	42	34.8584	3.26797	15.4	17.3	1	1	0	0	0	0	0	0	0	0	0	0	0	0	0	0	1	1	0	0	1	0	0	0	0	0	0	0	1	0	0	0	0	1	1	0	1	0
33	0	0	83	35.3	20.3828	1.8	23	33.9943	4.24929	13.3	13.4	1	1	1	1	0	0	0	0	0	0	0	0	0	1	1	0	1	1	1	1	0	0	0	0	0	0	0	0	1	0	0	0	0	1	1	0	1	0
34	0	0	64	43.7	18.4264	2.6	13	32.0366	5.72082	15.5	16.9	0	1	1	1	0	0	1	0	0	0	1	0	0	1	0	0	0	0	1	1	0	0	0	0	0	0	0	0	0	0	0	0	0	1	1	0	0	0
35	0	1	65	43.6	17.1813	2.3	44	36.6972	3.44037	25.3	25.3	1	1	0	1	0	0	0	0	0	0	0	0	0	0	0	0	0	0	0	0	0	0	0	0	0	0	0	0	0	0	0	0	0	0	0	0	0	0
36	0	0	89	49.3	23.0334	1.3	22	32.4544	5.07099	25.1	32.3	1	1	0	0	0	0	0	0	0	0	0	0	0	1	0	0	0	0	1	0	1	0	0	0	0	0	0	0	0	0	0	0	0	0	0	1	0	0
37	0	0	89	49.3	22.8768	1.8	33	32.4544	5.07099	8.2	13.3	1	1	0	0	0	0	0	0	0	0	0	0	0	0	0	0	0	0	0	0	0	0	0	0	0	0	0	0	0	0	0	0	0	-	-	0	0	0
38	0	0	89	43.1	21.2847	1.6	23	32.4826	4.64037	8.5	16.6	1	0	0	0	0	0	1	1	1	0	1	0	0	0	0	0	0	0	1	0	1	0	0	0	0	0	0	0	0	0	1	0	0	-	-	0	0	0
39	0	1	86	48.7	20.804	1.1	29	34.9076	5.13347	9.4	11.2	1	1	1	0	0	0	0	0	1	1	0	0	0	0	0	0	1	1	0	1	0	0	0	0	0	0	0	0	1	0	0	0	0	1	1	0	1	0
40	0	1	79	40	16.5424	2.3	18	32.5	5	20.4	20.4	0	0	0	0	0	0	1	1	1	0	1	0	0	0	0	0	0	0	1	0	0	1	0	0	0	0	0	0	0	0	1	0	0	1	1	0	0	0
41	0	0	80	48.8	21.6889	2.2	20	36.8852	5.12295	15	18	1	1	0	0	0	0	1	0	0	0	1	0	0	0	0	0	0	0	1	0	0	0	0	0	0	0	0	0	0	0	0	0	0	-	-	1	0	0
42	0	0	68	40	17.7778	3.1	11	35	5	16.7	24.2	1	1	1	0	0	0	0	1	0	0	0	0	1	1	1	0	0	0	0	1	0	0	0	0	0	0	0	0	0	0	1	0	0	1	1	0	0	0
43	0	1	77	45.5	18.2262	2.6	12	32.967	5.49451	18.9	23.7	1	1	1	0	0	0	1	0	0	0	0	1	0	0	0	0	1	1	0	1	0	0	0	0	0	0	0	0	0	0	0	0	0	1	1	0	1	0
44	0	0	58	49.1	19.8438	2.8	7	32.5866	5.09165	24.9	24.9	0	0	0	0	0	0	0	0	0	0	0	0	0	1	0	0	0	0	1	0	0	0	0	0	0	0	0	0	0	1	1	0	0	0	0	0	0	0
45	0	0	91	42	19.9762	2.4	21	33.3333	4.7619	9.2	13.3	1	1	1	0	0	0	1	0	0	0	1	0	0	0	0	0	1	1	1	0	1	0	0	0	0	0	0	0	0	0	0	0	0	0	1	0	1	0
46	0	0	70	77	31.2386	3	49	41.5584	3.8961	26.6	31.2	0	1	1	1	0	0	0	0	0	0	0	0	0	1	0	0	0	0	0	0	0	0	0	1	0	0	0	0	0	0	0	0	0	1	0	0	0	0
47	0	1	68	57.9	20.3929	2.3	49	34.5423	3.45423	15.1	17.2	1	0	1	0	0	0	0	0	1	0	0	1	0	0	0	0	0	0	0	0	0	1	0	0	0	0	0	0	0	0	1	0	0	0	0	0	0	0
48	0	1	49	58.4	20.6916	3	6	34.2466	5.13699	36.1	36.1	1	1	0	1	0	0	0	0	0	0	0	0	0	1	0	0	0	0	0	0	0	0	0	0	0	0	0	0	0	0	1	0	0	-	-	0	0	0
49	0	0	83	58	27.8545	1.7	26	34.4828	5.17241	9.8	16.7	1	1	1	0	0	0	1	0	0	0	0	0	0	0	0	0	1	1	1	1	0	0	0	0	0	1	0	0	1	0	0	0	0	1	1	0	1	0
50	0	1	85	54.4	22.6431	2.1	54	44.1176	3.67647	15.1	16.5	0	0	0	0	0	0	0	0	1	1	0	1	0	0	0	0	1	0	0	0	0	1	0	0	0	0	0	0	0	0	0	0	0	1	1	0	1	0
51	0	1	83	50.8	18.8416	2.5	41	39.3701	3.93701	9.5	21.8	0	0	0	0	0	0	0	0	1	0	1	1	0	0	0	0	1	0	1	0	0	1	0	0	0	0	0	0	0	0	0	0	0	1	1	0	1	0
52	0	1	51	55.6	17.7471	2.1	30	35.9712	5.39568	15.4	15.4	0	1	0	0	0	1	0	0	1	0	0	0	0	0	0	0	1	0	0	0	0	1	0	0	0	0	0	0	0	0	0	0	0	1	1	0	1	0
53	0	1	51	54.5	17.396	1.6	32	36.6972	5.50459	6.2	12	0	0	0	0	0	1	0	0	1	1	0	0	0	0	0	1	1	0	0	0	0	1	0	0	0	0	0	0	0	0	1	0	0	0	0	0	1	0
54	0	1	80	62	22.7732	2.8	51	38.7097	3.22581	21.3	21.3	1	0	0	0	0	0	0	0	0	0	1	0	0	0	0	0	0	0	0	0	0	0	0	0	0	0	0	0	0	0	0	0	0	1	1	0	0	0
55	0	1	83	57.4	21.6041	1.7	23	34.8432	5.22648	13	13.8	0	1	0	1	0	0	0	0	0	0	0	0	0	1	0	0	0	0	0	0	0	0	0	0	0	0	0	0	0	0	0	0	0	1	1	0	0	0
56	0	0	88	55.2	24.3706	2.4	31	36.2319	5.43478	19.3	19.3	1	1	1	0	0	0	0	0	0	0	0	0	0	0	0	0	1	1	0	1	0	0	0	1	0	0	0	0	1	0	0	0	0	1	0	0	1	0
57	0	1	73	50.8	19.9684	2.6	13	33.4646	4.92126	19.6	19.6	1	1	1	0	0	0	0	0	0	0	0	0	0	0	0	0	0	0	1	0	0	0	1	0	0	0	0	0	0	0	0	0	0	-	-	0	0	0
58	0	1	55	58.3	19.2562	3.1	50	41.1664	3.43053	15.4	15.4	0	0	0	0	0	1	0	0	1	0	0	0	0	0	0	0	0	0	0	1	0	0	0	0	0	0	0	0	0	0	0	0	0	1	1	0	0	0
59	0	1	66	88	30.0947	2.6	11	36.3636	4.54545	40.4	40.4	1	1	1	0	0	0	0	0	0	1	0	0	1	1	1	0	0	0	1	0	0	0	0	0	1	0	0	0	0	0	1	0	0	1	1	0	0	0
60	0	1	83	51.2	20	2.4	53	39.0625	3.90625	15.7	26.9	0	0	0	0	0	0	0	0	0	0	0	0	0	0	0	0	0	0	0	1	0	0	0	1	0	0	0	0	0	0	0	0	0	1	1	0	0	0
61	0	1	72	54.6	22.3785	2.3	10	32.967	4.57875	19.8	21	1	1	0	0	0	0	0	0	1	1	0	0	0	0	0	0	0	0	0	1	0	0	0	0	0	0	0	0	0	0	0	0	0	-	-	0	0	0
62	0	0	60	53	25.2081	3.1	40.3	45.283	3.77358	24.8	24.8	0	0	0	1	0	0	0	0	0	0	0	1	0	1	0	0	1	0	0	0	0	0	1	0	0	0	0	0	0	0	0	0	0	1	1	0	1	0
63	0	0	83	50	23.7812	2.8	21	36	5	27.7	27.7	1	1	0	0	0	0	0	0	0	0	1	0	0	0	0	0	1	1	1	0	1	0	0	0	0	0	0	0	1	0	0	0	0	0	1	0	1	0
64	0	0	86	72.5	34.2933	2.1	25	33.1034	5.51724	22.3	22.3	1	1	0	0	0	0	0	0	0	0	0	1	0	0	0	0	0	0	0	0	0	0	1	0	0	0	0	0	0	0	0	0	0	1	1	0	0	0
65	0	1	41	50.8	19.4768	2.7	41	39.3701	3.93701	27.1	27.1	0	1	1	1	0	0	0	0	1	0	0	0	0	1	0	0	0	0	0	0	0	0	0	1	0	0	0	0	0	0	0	0	0	1	1	0	0	0
66	0	1	72	78.5	27.6484	3.2	29	30.5732	5.09554	20.7	20.7	0	1	1	0	0	0	0	0	1	0	1	1	0	0	0	1	0	0	0	0	0	1	0	0	0	0	0	0	0	0	0	0	0	1	1	0	0	0
67	0	1	62	67.3	23.845	2.9	21	35.6612	5.94354	20.1	22.4	1	1	0	0	0	0	0	1	1	0	0	0	0	0	0	0	0	0	0	0	0	1	0	0	0	0	0	0	0	0	0	0	0	0	1	0	0	0
68	0	1	62	65.3	23.1363	2.6	22	30.6279	4.59418	15.3	15.3	1	1	0	0	0	0	0	1	1	0	0	0	0	0	0	0	0	0	0	0	0	1	0	0	0	0	0	0	0	0	0	0	0	1	1	0	0	0
69	0	0	49	80.7	32.1229	2.9	29	32.2181	4.95663	26.1	26.1	0	1	1	0	0	0	0	1	0	0	0	0	0	1	1	0	0	0	1	0	0	1	0	0	0	0	0	0	0	0	0	0	0	-	-	0	0	0
70	0	0	76	67	27.1816	2.8	61	44.7761	5.97015	25.1	35.5	0	0	0	0	0	0	0	0	0	0	0	0	0	0	0	0	0	0	0	0	0	0	0	1	0	0	0	0	0	0	0	0	0	1	1	0	0	0
71	0	1	72	65	21.9713	2.4	21	30.7692	4.61538	10.1	10.1	1	1	0	0	0	0	0	0	1	0	0	1	0	0	0	0	0	0	1	1	0	0	0	0	0	0	0	0	0	0	1	0	0	-	-	1	0	0
72	0	1	75	64.9	22.5628	2.5	18	30.8166	4.6225	17.8	20.5	0	1	0	0	0	0	0	0	1	0	0	0	0	0	0	0	1	0	1	0	0	0	0	0	1	0	0	0	0	0	0	0	0	1	1	0	1	0
73	0	1	71	60.3	23.4374	2.1	44	39.801	3.31675	26.3	26.3	0	0	0	0	0	0	0	1	1	0	0	0	0	0	0	1	0	0	0	0	0	1	0	0	0	0	0	0	0	0	0	0	0	1	1	0	0	0
74	0	1	83	58	22.9421	2	33	34.4828	5.17241	22.7	22.7	1	1	0	0	0	0	1	0	0	1	1	0	0	0	0	0	0	0	1	0	0	0	0	0	0	0	0	0	0	1	1	0	0	-	-	0	0	0
75	0	1	67	85.2	24.4953	2.9	68	49.8826	5.86854	39.9	39.9	1	0	0	0	0	0	0	0	0	0	0	1	0	0	0	0	1	1	0	1	0	0	0	0	0	0	0	0	0	0	0	0	0	1	1	0	1	0
76	0	1	74	64.2	25.0468	2.8	46	37.3832	3.11526	22.4	22.4	0	1	0	0	0	0	0	0	0	0	0	1	0	0	0	0	0	0	0	0	0	1	0	0	0	0	0	0	0	0	0	0	0	1	1	0	0	0
77	0	1	38	81.5	26.5515	2.3	26	31.9018	4.90798	29	32.9	1	1	1	0	0	0	0	0	0	0	0	1	0	0	0	0	1	1	0	0	0	0	0	1	0	0	0	0	0	0	0	0	0	1	1	0	1	0
78	0	0	69	50.2	20.109	2.7	15	33.8645	4.98008	20.8	29.1	1	1	0	0	0	0	0	0	0	0	0	1	0	0	0	0	0	0	0	0	0	0	0	1	0	0	0	0	0	0	1	0	0	1	1	0	0	0
79	0	1	76	59.6	23.8744	2.7	26	33.557	5.03356	15.3	15.5	0	1	1	0	0	0	0	0	1	0	0	1	0	0	0	0	0	0	0	0	0	0	0	0	0	0	0	0	0	0	0	0	0	-	-	0	0	0
80	0	0	70	71.2	26.3758	2.9	52	39.3258	3.51124	21.2	21.2	0	0	0	0	0	0	0	0	0	0	1	1	0	0	0	0	0	0	1	0	0	0	0	0	0	0	0	0	0	0	0	0	0	-	-	0	0	0
81	0	1	45	77	25.1429	3.2	52	41.5584	3.24675	29.4	29.4	0	0	0	0	0	0	0	0	0	0	0	1	0	0	0	0	0	0	0	0	0	0	0	1	0	0	0	0	0	0	0	0	0	1	1	0	0	0
82	0	0	83	38.6	19.1971	2.6	51	41.4508	3.88601	15.5	15.5	1	0	0	1	0	0	1	0	1	0	0	0	0	1	0	0	1	1	0	0	1	0	0	0	0	0	0	0	1	0	0	0	0	0	0	1	1	0
83	0	1	60	45.8	18.5809	2.7	45	43.6681	3.27511	17.5	17.5	0	0	1	0	0	1	0	0	1	1	0	0	0	0	0	1	1	1	0	1	0	0	0	0	0	0	0	0	1	0	0	0	0	1	1	0	1	0
84	0	0	66	46.3	19.5227	2.3	21	34.5572	5.39957	24.5	24.5	1	1	0	0	0	0	0	0	0	0	0	0	0	1	0	0	0	0	0	0	0	0	0	0	0	0	0	0	0	0	0	0	0	-	-		0	0
85	0	0	78	48	22.213	2.3	14	35.4167	5.20833	14.4	14.4	0	1	0	0	0	0	0	0	0	0	0	0	0	0	0	0	0	0	1	0	0	0	0	1	0	0	0	0	0	0	0	0	0	1	0		0	0
86	0	1	95	42	18.6667	1.5	42	38.0952	3.57143	14.4	14.4	0	1	0	0	0	0	0	0	1	0	0	0	0	0	0	0	0	0	0	0	0	1	0	0	0	0	0	0	0	0	0	0	0	1			0	0
87	0	0	93	40	20.4082	2.2	17	33.75	5	20	20	1	0	0	0	0	0	0	0	1	0	0	0	0	0	0	0	0	0	1	1	0	0	0	0	1	0	0	0	0	0	0	0	0	1	0		0	0
88	0	0	51	38.8	15.4445	2.4	28	36.0825	5.15464	10.9	10.9	0	1	0	0	0	1	0	0	0	1	0	0	0	0	0	0	0	0	0	1	0	0	0	0	0	0	0	0	0	0	0	0	0	1			0	1
89	0	1	69	43.2	15.772	2.8	20	32.4074	4.62963	15.6	15.6	0	1	1	0	0	0	1	1	1	0	0	1	0	1	0	0	0	0	1	0	0	1	0	0	0	0	0	0	0	0	0	0	0	1	1		0	0
90	0	0	65	49	21.0696	2.8	20	34.6939	5.10204	15.2	15.2	0	1	1	0	0	0	1	1	1	1	1	0	0	0	0	0	1	1	1	0	1	0	0	0	0	0	0	0	1	0	0	0	0	0	0	1	1	0
91	0	0	79	33.5	19.0815	1.8	24	35.8209	4.47761	8.6	8.6	0	1	1	1	1	0	0	0	0	1	0	0	0	1	0	0	0	0	1	0	1	0	0	0	0	0	0	0	0	1	1	0	0	1			0	1
92	0	0	83	34.5	16.409	2.2	44	40.5797	4.34783	15.9	15.9	0	0	1	0	0	0	0	0	1	0	0	1	0	0	0	0	0	0	1	0	1	0	0	0	0	0	0	0	0	0	0	0	0	1			0	1
93	0	0	47	48	19.9792	1.5	43	41.6667	3.125	17.2	17.2	0	0	0	0	0	1	0	0	0	1	0	0	0	0	0	0	0	0	0	1	0	0	0	0	0	0	0	0	0	0	0	0	0	-	-		0	0
94	0	0	83	47.7	18.6328	2.3	11	33.543	5.24109	19.4	19.4	0	1	1	1	0	0	0	0	0	0	0	0	0	0	0	0	0	0	0	0	0	0	0	0	0	0	0	0	0	0	0	0	0	-	-		0	0
95	0	0	73	30	14.6297	3.2	54	40	3.33333	15.2	15.2	1	0	0	0	0	0	0	0	0	0	0	1	0	0	0	0	0	0	0	0	0	0	0	0	0	0	0	0	0	0	0	0	0	-	-		0	0
96	0	1	58	48	16.609	2.9	40	41.6667	3.125	25.2	25.2	1	1	0	0	0	0	0	0	0	0	0	1	0	0	0	0	0	0	0	0	0	0	0	0	0	0	0	0	0	0	0	0	0	-	-		0	0
97	0	0	56	47.4	19.4773	1.9	23	33.7553	5.27426	16.5	16.5	0	1	1	0	0	0	0	1	1	0	0	0	0	0	0	0	0	0	0	0	0	0	0	0	0	0	0	0	0	0	0	0	0	-	-		0	0
98	0	0	52	46.1	17.7187	2.3	40	34.7072	3.2538	18.9	18.9	0	0	0	0	0	0	0	0	1	0	0	0	0	0	0	1	0	0	0	0	0	0	0	0	0	0	0	0	0	0	1	0	0	-	-		0	0
99	0	1	75	46.8	17.4004	3.3	48	42.735	3.20513	20.5	20.5	1	0	1	0	0	0	0	0	1	0	0	0	0	0	0	0	0	0	0	0	0	0	0	1	0	0	0	0	0	0	0	0	0	1			0	1
100	0	0	80	48	23.8048	2.2	16	35.4167	5.20833	15.1	15.1	1	1	0	0	1	0	1	0	0	0	1	0	0	0	0	0	0	0	1	0	1	0	0	0	0	0	0	0	0	0	0	0	0	1			0	0
101	0	1	90	49	17.782	2.1	46	40.8163	4.08163	12.1	12.1	0	0	0	1	0	0	0	0	1	0	0	0	0	1	0	0	0	0	0	1	0	0	0	0	0	0	0	0	0	0	0	0	0	1			0	0
102	0	1	75	46.4	17.464	3.2	27	34.4828	5.38793	17.5	17.5	1	1	0	0	0	0	0	0	1	0	0	0	0	0	0	0	0	0	0	1	0	0	0	0	0	0	0	0	0	1	1	0	0	1			0	0
103	0	0	72	49	19.6283	3.3	18	34.6939	5.10204	16.6	16.6	1	1	1	0	0	0	1	0	0	0	1	1	0	0	0	0	0	0	0	0	0	0	1	0	0	0	0	0	0	0	0	0	0	-	-		0	0
104	0	0	71	73.4	29.7781	2.6	33	32.6975	5.44959	16.4	16.4	0	1	1	1	0	0	1	0	0	0	1	0	0	1	0	0	0	0	1	0	0	0	0	0	0	0	0	0	0	0	0	0	0	-	-		0	0
105	0	1	43	75	24.4898	2.6	46	40	3.33333	13.7	13.7	1	1	0	0	0	0	1	1	0	0	1	0	0	0	0	0	0	0	1	0	0	0	0	0	0	0	0	0	0	0	0	0	0	-	-		0	0
106	0	1	67	60.9	23.9384	2.9	54	39.4089	3.28407	15	15	1	0	1	1	0	0	0	0	0	0	0	1	0	1	0	0	0	0	0	0	0	0	0	0	0	0	0	0	0	0	0	0	0	-	-		0	0
107	0	0	68	57	22.8329	3.1	57	42.1053	3.50877	27	27	1	0	0	0	0	0	1	0	0	0	0	0	0	0	0	0	0	0	0	0	0	0	0	0	0	0	0	0	0	0	0	0	0	1			0	0
108	0	1	72	58	22.155	2.7	52	41.3793	3.44828	17.1	17.1	1	0	1	1	0	0	0	0	0	0	0	1	0	1	1	0	0	0	0	0	0	0	0	1	0	0	0	0	0	0	0	0	0	-	-		0	0
109	0	1	67	56.7	18.5143	2.6	42	42.328	3.52734	15.4	15.4	1	0	0	0	0	0	0	1	0	0	0	0	0	0	0	0	0	0	0	1	0	0	0	0	0	0	0	0	0	0	0	0	0	1	0		0	0
110	0	1	67	56.8	19.4021	3.3	40	42.2535	3.52113	18.7	18.7	1	1	1	0	0	0	1	0	1	0	1	1	0	0	0	1	0	0	0	0	0	0	0	0	0	0	0	0	0	0	0	0	0	1	1		0	0
111	0	1	79	56	24.2382	3.2	37	35.7143	5.35714	18.7	18.7	1	0	0	0	0	0	1	0	0	0	1	0	0	0	0	0	0	0	1	0	0	0	0	0	0	0	0	0	0	0	0	0	0	1	1		0	0
112	0	1	80	57.9	23.853	2.7	31	34.5423	5.18135	16.4	16.4	1	1	0	0	0	0	1	1	1	0	1	0	0	0	0	0	0	0	1	1	0	0	0	0	0	0	0	0	0	0	0	0	0	1	1		0	0
113	0	1	65	51	20.0219	3.1	32	33.3333	4.90196	15.6	15.6	1	1	0	1	0	0	0	0	0	0	0	1	0	0	0	0	0	0	0	0	0	0	0	0	0	0	0	0	0	0	0	0	0	1	1		0	0
114	0	1	69	62.9	22.1803	1.6	21	31.7965	4.76948	15.7	15.7	1	1	0	0	0	0	0	0	0	0	1	0	0	0	0	0	0	0	1	1	0	0	0	0	0	0	0	0	0	0	1	0	0	1			0	0
115	0	1	85	68.8	23.5286	2.5	42	34.8837	3.63372	11.4	11.4	1	1	0	0	0	0	0	1	1	1	1	0	0	0	0	0	1	0	1	0	0	1	0	0	0	0	0	0	0	0	0	0	0	1	1	0	1	0
116	0	1	67	58	22.3757	2.6	24	34.4828	5.17241	21.5	21.5	0	1	0	0	0	0	1	0	0	0	1	0	1	1	1	0	1	1	1	0	1	0	0	0	0	0	0	0	1	0	0	0	0	0	1	0	1	0
117	0	1	79	62.2	21.7779	2.2	48	38.5852	3.21543	9.7	9.7	1	0	0	1	0	0	1	0	0	0	1	1	0	1	0	0	1	1	1	0	1	0	0	0	0	0	0	0	1	0	0	0	0	0	1	0	1	0
118	0	1	80	54.3	24.1333	2.7	27	33.1492	5.52486	11	11	1	1	1	0	1	0	1	0	0	0	1	0	0	0	0	0	0	0	1	0	0	0	0	0	0	0	0	0	0	0	0	0	0	-	-		0	0
119	0	1	79	55.3	24.5778	2.8	18	32.5497	5.42495	27	27	1	1	1	0	1	0	0	0	0	0	0	0	0	0	0	0	0	0	0	1	0	0	0	0	0	0	0	0	0	0	0	0	0	-	-		0	0
120	0	1	85	57	19.8397	2.6	43	35.0877	3.50877	18.6	18.6	1	1	0	0	0	0	0	0	0	0	0	0	0	0	0	0	1	0	0	0	0	0	1	0	0	0	0	0	0	0	0	0	0	1	1	0	1	0
121	0	1	70	82.67	26.4774	3	49	38.7081	3.62889	19.1	19.1	0	0	0	0	0	0	0	0	0	0	0	0	0	0	0	0	1	0	0	0	0	0	0	0	1	0	0	0	0	0	0	0	0	1	1	0	1	0
122	0	1	41	55.9	19.4568	3.1	49	42.9338	3.57782	24.3	24.3	0	0	0	0	0	1	0	1	0	1	0	0	0	0	0	0	0	0	0	1	0	0	0	0	0	0	0	0	0	0	0	0	0	1			0	0
123	0	1	41	57.4	19.9789	3.2	56	41.8118	3.48432	28.4	28.4	0	0	0	0	0	1	0	1	0	1	0	0	0	0	0	0	1	1	0	1	0	0	0	0	0	0	0	0	1	0	1	0	0	1	1	0	1	0
124	0	1	82	72.3	27.8924	2.2	18	33.195	4.84094	17.3	17.3	1	1	1	0	0	0	1	0	0	0	1	0	0	0	0	0	0	0	1	0	1	0	0	0	0	0	0	0	0	0	0	0	0	-	-		0	0
125	0	0	52	69.7	29.2753	2	19	28.6944	5.02152	18.2	17.7	0	1	0	1	0	0	0	0	0	0	0	0	0	1	1	0	0	0	0	0	0	1	0	0	0	0	0	0	0	0	0	0	0	1			0	0
126	0	1	67	52.4	19.1309	3.1	30	38.1679	4.77099	28.8	28.8	0	1	0	0	0	0	0	0	1	0	0	0	0	1	0	0	0	0	0	0	0	1	0	0	0	0	0	0	0	0	0	0	0	1	1		0	0
127	0	0	83	50	23.7812	2.2	15	34	5	11.9	11.9	1	1	0	0	0	0	1	0	0	0	1	1	0	0	0	0	1	1	1	0	1	0	0	0	0	0	0	0	1	0	0	0	0	1	1	0	1	0
128	0	1	87	57	21.401	2.1	30	35.0877	4.38596	13.5	13.5	1	1	0	0	0	0	0	0	1	0	0	0	0	0	0	0	1	1	0	1	0	0	0	0	0	0	0	0	0	0	0	0	0	0			1	0
129	0	1	73	80.3	27.7202	2.3	23	34.8692	4.98132	19.9	22.8	1	1	1	0	1	0	1	0	0	0	0	0	1	1	0	0	1	1	0	0	1	0	0	0	0	0	0	0	1	0	1	0	0	1	1	0	1	0
130	0	1	79	50.8	18.6593	2.8	21	33.4646	5.90551	25.6	25.6	1	1	1	0	0	0	0	0	0	0	0	0	0	0	0	0	0	0	0	1	0	0	0	0	1	0	0	0	0	0	0	0	0	1			0	0
131	0	1	82	62	22.6906	3	36	32.2581	4.83871	8.5	8.5	1	1	1	1	1	0	1	0	0	0	1	1	0	1	0	0	0	0	1	0	0	0	0	0	0	0	0	0	0	0	0	0	0	-	-		0	0
132	0	0	91	54.7	25.1763	2.3	37	36.5631	5.48446	13.8	13.8	1	1	0	0	0	0	1	1	0	0	1	0	0	0	0	0	0	0	1	0	1	0	0	0	0	0	0	0	0	0	0	0	0	-	-		0	0
133	0	1	65	71.4	23.583	3.3	45	39.2157	3.5014	20	20	0	1	0	1	1	0	0	0	0	0	0	1	0	0	0	0	0	0	0	0	0	0	0	0	0	0	0	0	0	0	0	0	0	0			0	0
134	0	1	55	62.7	19.5687	2.9	41	38.2775	3.18979	16.8	16.8	0	1	0	0	0	1	0	0	1	1	0	0	0	0	1	0	0	0	0	1	0	0	0	0	0	0	0	0	0	0	0	0	0	1			0	0
135	0	1	55	76	23.9869	2.6	47	36.8421	3.28947	22.9	22.9	1	0	0	0	0	0	0	0	0	0	0	1	0	0	0	0	0	0	0	0	0	0	0	0	0	0	0	0	0	0	0	0	0	0			0	0
136	0	1	79	58.3	24.1106	2.8	40	41.1664	3.43053	21.6	21.6	0	0	0	0	0	0	0	0	1	0	0	1	0	0	0	0	0	0	0	0	0	1	0	0	0	0	0	0	0	0	0	0	0	1			0	0
137	0	1	75	57.5	18.8833	2.9	51	41.7391	3.47826	25.6	25.6	1	0	0	0	0	0	0	0	1	0	0	0	0	0	0	1	0	0	0	0	1	0	0	0	0	0	0	0	0	0	0	0	0	1			0	0
138	0	1	68	73.9	27.1442	2.9	55	40.5954	3.38295	24.5	24.5	0	0	1	0	0	0	0	0	0	0	0	0	0	0	0	0	0	0	0	0	0	0	1	0	0	0	0	0	0	0	0	0	0	1			0	0
139	0	0	74	62.7	22.563	2	34	31.8979	5.58214	12	12	0	1	1	0	0	0	0	1	1	0	0	0	0	0	0	0	0	0	0	0	1	0	0	0	0	0	0	0	0	0	0	0	0	-	-		0	0
140	0	1	87	60	24.974	2.4	6	33.3333	5	27.6	27.6	1	1	1	0	1	0	0	0	0	0	0	0	0	0	0	0	0	0	1	0	0	0	0	0	0	0	0	0	0	1	1	0	0	-	-		0	0
141	0	1	80	52	19.5717	1.9	54	38.4615	3.84615	14	14	1	0	0	0	0	0	1	0	0	0	1	0	0	0	0	0	0	0	1	1	0	0	0	0	0	0	0	0	0	0	0	0	0	1			0	0
142	0	1	51	70	25.7117	1.6	20	34.2857	5	9.7	9.7	1	1	0	0	0	0	1	1	0	1	1	0	0	0	0	0	0	0	1	0	0	0	0	0	0	0	0	0	0	0	0	0	0	-	-		0	0
143	0	1	72	53.4	20.3475	2.2	31	33.7079	4.68165	16.3	16.3	1	1	0	0	0	0	0	1	1	0	0	0	0	0	0	0	0	0	1	0	0	0	0	0	0	0	0	0	0	1	1	0	0	-	-		0	0
144	0	0	86	64.6	30.1817	2.7	40	37.1517	3.09598	16.8	16.8	0	0	1	0	0	0	0	1	1	0	0	1	0	0	0	0	0	0	0	0	0	1	0	0	0	0	0	0	0	0	0	0	0	1			0	0
145	0	1	59	77	27.5105	2.4	26	33.7662	5.19481	12.7	12.7	1	1	0	0	0	0	1	0	1	0	1	1	0	0	0	0	0	0	1	1	0	0	0	0	0	0	0	0	0	0	0	0	0	-	-		0	0
146	0	1	68	58.4	22.2527	3.6	52	41.0959	3.42466	16.1	16.1	0	0	0	0	0	0	0	0	1	0	0	0	0	0	0	0	1	0	0	0	0	0	1	0	0	0	0	0	0	0	0	0	0	1	1	0	1	0
147	0	1	63	62.4	21.3399	2.6	47	38.4615	3.20513	17.5	17.5	0	0	0	0	0	0	1	0	0	1	1	0	0	0	0	0	0	0	0	0	1	0	0	0	0	0	0	0	0	0	0	0	0	-	-		0	0
148	0	1	67	57	17.9902	1.5	56	42.1053	3.50877	12.9	12.9	0	0	0	0	0	1	0	0	0	0	0	1	0	0	0	0	0	0	0	0	0	1	0	0	0	0	0	0	0	0	0	0	0	1			0	0
149	0	0	26	56	20.0796	3.3	56	42.8571	3.57143	21.3	21.3	0	0	0	0	0	1	0	0	0	0	0	0	0	0	1	0	0	0	0	0	0	0	0	0	0	0	0	0	0	0	0	0	0	-	-		0	0
150	0	1	83	58	22.9421	1.7	50	41.3793	3.44828	13.2	13.2	1	0	0	0	0	0	1	1	0	0	1	0	0	0	0	0	0	0	1	0	0	0	0	0	0	0	0	0	0	0	0	0	0	-	-		0	0
151	0	1	60	65.3	20.6098	1.9	50	36.7534	3.06279	12.8	12.8	0	0	0	0	0	0	0	1	1	0	0	0	0	0	0	0	0	0	1	0	0	1	0	0	0	0	0	0	0	0	0	0	0	-	-		0	0
152	0	1	66	66.9	23.4235	3.6	50	35.8744	2.98954	17	17	1	0	0	0	0	0	0	0	0	0	0	1	0	0	0	0	0	0	0	0	0	0	0	0	0	0	0	0	0	0	0	0	0	-	-		0	0
153	0	0	78	55.3	23.6234	2.3	57	43.3996	3.61664	12.9	12.9	0	0	0	0	0	0	0	0	1	0	0	0	0	0	0	1	0	0	0	1	0	0	0	0	0	0	0	0	0	0	0	0	0	1			0	0
154	0	1	66	82.5	23.719	3	50	38.7879	3.63636	13.7	13.7	1	0	0	0	0	0	0	0	0	0	0	1	0	0	0	0	0	0	0	0	0	0	1	0	0	0	0	0	0	0	0	0	0	-	-		0	0
155	0	1	74	60	23.4082	2	55	40	3.33333	18.7	18.7	0	1	0	0	0	0	0	0	0	0	0	1	0	0	0	0	0	0	0	0	0	1	0	0	0	0	0	0	0	0	0	0	0	1			0	0
156	0	1	81	50	19.052	2.4	29	38	5	14.7	14.7	0	1	1	0	0	0	0	0	0	1	0	0	0	0	0	0	0	0	0	1	0	0	0	0	0	0	0	0	0	1	1	0	0	1			0	0
157	0	1	75	60	22.5827	2.3	20	33.3333	5	15.9	15.9	1	1	0	0	0	0	0	0	1	0	0	0	0	0	0	0	0	0	1	1	0	0	0	0	0	0	0	0	0	0	0	0	0	1			0	0
158	0	0	59	60	28.5375	2.6	22	33.3333	5	17.2	17.2	0	1	0	0	0	0	1	0	0	1	1	0	0	0	0	0	0	0	1	1	0	0	0	0	0	0	0	0	0	1	1	0	0	-	-		0	0
159	0	1	63	61.6	20.1143	2.2	7	32.4675	4.87013	19.5	19.5	0	1	0	0	0	0	0	0	0	0	0	0	0	1	0	0	0	0	0	0	0	0	0	0	0	0	0	0	0	0	0	0	0	-	-		0	0
160	0	0	57	55.5	20.7869	1.8	47	43.2432	3.6036	11.6	11.6	0	1	0	0	0	0	0	0	1	0	0	0	0	0	0	0	0	0	1	1	0	0	0	0	0	0	0	0	0	0	0	0	0	-	-		0	0
161	0	1	83	55.6	21.3172	2.4	52	43.1655	3.59712	15.5	15.5	0	1	0	0	0	0	0	0	1	0	0	0	0	0	0	1	0	0	0	1	0	0	0	0	0	0	0	0	0	0	0	0	0	1			0	0
162	0	1	78	73.5	29.4052	2.5	50	40.8163	3.40136	19.1	19.1	1	0	0	0	0	0	1	0	0	0	0	1	0	0	0	0	0	0	0	0	1	0	0	0	0	0	0	0	0	0	0	0	0	-	-		0	0
163	0	1	81	58.8	20.9579	2.3	27	34.0136	5.10204	17	17	0	0	0	0	1	0	0	0	1	1	0	0	0	0	0	0	0	0	0	1	0	0	0	0	0	0	0	0	0	0	0	0	0	1			0	0
164	0	1	58	82.9	31.2018	2	51	38.6007	3.61882	20.1	20.1	0	0	0	0	0	0	0	0	1	0	0	1	0	0	0	0	0	0	0	0	0	1	0	0	0	0	0	0	0	0	0	0	0	1			0	0
165	0	0	84	69.3	33.1434	3.2	51	40.404	3.6075	23.9	23.9	1	0	0	0	0	0	1	0	0	0	1	1	0	0	0	0	0	0	1	0	0	0	0	0	0	0	0	0	0	0	0	0	0	-	-		0	0
166	0	1	54	68	21.9525	2.1	16	35.2941	5.14706	12.8	12.8	0	1	0	0	0	1	1	0	0	0	1	1	0	0	0	0	1	1	1	0	1	0	0	0	0	0	0	0	1	0	0	0	0	0	1	0	1	0
167	0	0	83	45	19.4771	1.8	76.6	44.4444	6.66667	13.5	13.5	0	0	1	1	0	0	1	1	0	1	1	0	0	1	0	0	0	0	0	1	0	0	0	0	0	0	0	0	0	0	0	0	0	0			0	0
168	0	0	70	47.5	18.7888	1.5	164	52.6316	6.31579	7.9	7.9	1	0	0	0	0	0	0	0	1	1	0	1	0	0	0	0	0	0	0	0	0	1	0	0	0	0	0	0	0	0	0	0	0	1			0	0
169	0	0	84	32.9	15.2251	2	139	53.1915	6.07903	12.8	12.8	0	0	0	0	0	0	0	0	1	1	0	1	0	0	0	0	0	0	0	0	0	1	0	0	0	0	0	0	0	0	0	0	0	1	1		0	0
170	0	1	86	45.6	16.5282	2.3	62	43.8596	6.57895	12.4	12.4	0	0	0	1	0	0	0	0	1	0	0	1	0	0	0	0	0	0	0	0	0	1	0	0	0	0	0	0	0	0	0	0	0	1	1		0	0
171	0	1	56	39.6	14.4577	2.8	97.7	50.5051	6.31313	14.8	14.8	0	0	0	0	0	1	0	0	0	0	0	0	0	0	0	0	0	0	0	1	0	0	0	0	0	0	0	0	0	0	0	0	0	1	1		0	0
172	0	1	62	38.6	13.2006	1.7	161	51.8135	6.47668	7.5	7.5	0	0	0	0	0	1	0	1	0	1	0	1	0	0	0	0	0	0	0	0	0	0	0	0	0	0	0	0	0	0	0	0	0	1	1		0	0
173	0	0	76	35	15.1489	2.7	80	50	7.14286	16.5	16.5	0	0	0	0	0	0	0	0	0	0	0	1	0	0	0	0	1	0	0	0	0	0	1	0	0	0	0	0	0	0	0	0	0	1	1	0	1	0
174	0	1	65	46.7	17.1534	2.4	72	42.8266	6.42398	20.5	20.5	0	0	0	0	0	0	0	0	1	0	0	1	1	1	1	0	1	1	0	0	1	1	0	0	0	0	0	0	1	0	0	0	0	1	1	0	1	0
175	0	0	78	37.3	15.934	3.1	79	53.6193	6.70241	32.9	32.9	1	0	0	1	0	0	0	0	0	0	0	0	0	1	0	0	1	1	0	0	1	0	0	0	0	0	0	0	1	0	0	0	0	1	1	0	1	0
176	0	0	86	43.4	19.4181	2.6	89	46.0829	6.91244	11.2	11.2	0	0	0	0	0	0	0	0	1	0	0	1	0	0	0	0	0	0	0	0	0	0	1	0	0	0	0	0	0	0	0	0	0	1	1		0	0
177	0	1	51	38.5	15.7797	3.3	66	51.9481	6.49351	23.9	23.9	0	0	0	0	0	1	0	0	0	0	0	1	0	0	0	0	0	0	0	1	0	0	0	0	0	0	0	0	0	0	0	0	0	1			0	0
178	0	1	36	49.7	19.1498	1.8	101	50.3018	7.04225	10.5	10.5	0	0	0	0	0	1	0	0	0	1	0	0	0	0	0	0	0	0	0	1	0	0	0	0	0	0	0	0	0	0	0	0	0	1			0	0
179	0	1	78	40.6	16.4085	2.2	181	49.2611	6.15764	10.7	10.7	0	0	0	0	0	0	0	0	1	0	0	0	0	0	0	1	1	1	0	1	0	0	0	0	0	0	0	0	1	0	0	0	0	1	1	0	1	0
180	0	1	42	46.9	17.0199	2.2	85	42.6439	6.39659	8.9	8.9	0	0	0	0	0	1	0	0	0	1	0	0	0	0	0	0	0	0	0	1	0	0	0	0	0	0	0	0	0	0	0	0	0	1	0		0	1
181	0	0	35	37.9	15.1819	2	101	52.7704	6.59631	18.3	18.3	0	0	0	0	0	1	0	0	0	1	0	1	0	0	0	0	0	0	0	0	0	1	0	0	0	0	0	0	0	0	0	0	0	-	-		0	0
182	0	0	34	44.1	17.6654	2.3	80.6	51.0204	6.80272	15.6	15.6	0	0	0	0	0	1	0	0	0	1	0	1	0	0	0	0	0	0	0	0	0	0	0	0	0	0	0	0	0	0	0	1	1	-	-		0	0
183	0	1	57	47.5	17.4472	2.6	68	52.6316	6.31579	26.7	26.7	0	0	0	0	0	0	0	0	1	1	0	0	0	0	0	0	0	0	0	0	0	0	0	0	0	0	0	0	0	0	1	0	0	-	-		0	0
184	0	0	76	46	20.4444	2.6	113	54.3478	6.52174	10.3	8.2	0	0	0	1	0	0	0	0	0	0	1	0	0	0	0	0	1	1	1	0	1	0	0	0	0	0	0	0	1	0	1	0	0	0	0	0	1	0
185	0	0	40	45.1	17.6172	2	114	55.4324	6.65188	14.1	14.1	0	0	0	0	0	1	0	0	0	0	0	1	0	0	0	0	1	0	0	0	0	0	1	0	0	0	0	0	0	0	0	0	0	1	1	0	1	0
186	0	0	82	49.2	22.4617	2.4	75	50.813	6.09756	19.3	19.3	1	0	0	0	0	0	0	0	0	0	0	0	0	0	0	0	0	0	1	1	0	0	0	0	0	0	0	0	0	0	0	0	0	1			0	0
187	0	0	30	41	17.5146	4.1	100	48.7805	7.31707	14.4	14.4	0	0	0	0	0	1	0	0	0	1	0	0	0	1	0	0	0	0	0	0	0	0	0	0	0	0	0	0	0	0	0	0	0	-	-		0	0
188	0	0	29	41.8	17.8564	3.7	89	47.8469	7.17703	16	16	0	0	0	0	0	1	0	0	0	1	0	0	0	1	0	0	0	0	0	1	0	0	0	0	0	0	0	0	0	0	0	0	0	-	-		0	0
189	0	0	29	44	18.7962	4	101	45.4545	6.81818	23.1	23.1	0	0	0	0	0	1	0	0	0	1	0	0	0	1	0	0	0	0	0	1	0	0	0	0	0	0	0	0	0	0	0	0	0	-	-		0	0
190	0	0	62	43.6	18.1478	2.5	191	57.3394	6.88073	21.9	21.9	1	0	1	1	0	0	0	0	0	0	1	0	0	1	1	0	0	0	0	0	0	0	0	0	1	0	0	0	0	0	0	0	0	1			0	0
191	0	0	61	47.7	19.8543	2.1	64	52.4109	6.28931	12.4	12.4	1	0	1	1	0	0	0	0	0	0	0	0	0	1	1	0	0	0	0	0	0	0	0	0	0	0	0	0	0	0	0	0	0	-	-		0	0
192	0	0	41	45.6	16.9542	3.6	62	43.8596	6.57895	20.9	20.9	0	0	0	0	0	1	0	0	0	1	0	0	0	0	1	0	0	0	0	0	0	0	0	0	0	0	0	0	0	0	0	0	0	-	-		0	0
193	0	1	66	44.2	19.909	1.9	140	50.905	6.78733	15.4	15.4	1	0	0	0	1	0	1	0	0	0	1	0	0	0	0	0	1	1	1	0	1	0	0	0	0	0	0	0	0	0	0	0	0	1			1	0
194	0	1	71	48.3	17.8491	3.6	66	51.7598	6.21118	19.6	19.6	0	0	0	0	0	1	0	0	0	0	0	0	0	0	0	0	1	1	0	1	0	0	0	0	0	0	0	0	1	0	0	0	0	1	1	0	1	0
195	0	0	43	25.4	11.1399	2.4	69	49.2126	5.90551	9.3	9.3	0	0	0	0	0	0	0	0	0	1	0	0	0	0	0	0	0	0	0	1	0	0	0	0	0	0	0	0	0	0	0	0	0	1			0	1
196	0	0	47	40.6	16.8991	2	114	49.2611	6.15764	13.3	13.3	0	0	0	0	0	1	0	0	0	1	0	1	0	0	0	0	1	0	0	0	0	1	0	0	0	0	0	0	0	0	0	0	0	1	1	0	1	0
197	0	0	47	44.8	18.6472	2.3	75	44.6429	6.69643	10.1	10.1	0	0	0	0	0	1	0	0	0	1	0	0	0	0	0	0	1	1	0	1	0	0	0	0	0	0	0	0	1	0	0	0	0	0	0	0	1	0
198	0	0	47	48	19.9792	2.4	98	52.0833	7.29167	25.5	25.5	0	0	0	0	0	1	0	0	0	1	0	0	0	0	0	0	0	0	0	0	0	0	0	0	0	0	0	0	0	0	0	0	0	-	-		0	0
199	0	0	62	37.3	16.1444	2.6	98	53.6193	6.70241	17	17	1	0	0	1	0	0	0	0	0	0	0	0	0	0	0	0	0	0	0	0	0	0	1	0	0	0	0	0	0	0	0	0	0	1			0	0
200	0	0	70	44.4	20.2703	1.7	104	56.3063	6.75676	17.3	17.3	0	0	0	0	0	0	0	0	1	0	0	1	0	0	0	0	0	0	0	0	0	1	0	0	0	0	0	0	0	0	0	1	1	1			0	0
201	0	0	76	47.4	20.4352	2.3	80	52.7426	6.32911	15.2	15.2	0	0	1	0	0	0	0	0	1	0	0	1	0	0	0	0	1	0	0	0	0	0	1	0	0	0	0	0	0	0	0	0	0	1	1	0	1	0
202	0	1	59	45.5	15.4337	1.9	82	43.956	6.59341	10.5	10.5	0	0	1	0	0	0	0	0	1	0	0	0	0	0	0	0	0	0	0	1	0	0	0	0	0	0	0	0	0	0	0	0	0	-	-		0	0
203	0	1	44	49	15.6405	2.2	74	51.0204	7.14286	18.7	18.7	0	0	0	0	0	0	0	0	1	1	0	0	0	0	0	0	0	0	0	0	0	0	0	0	0	0	0	0	0	0	0	1	1	-	-		0	0
204	0	1	57	40.2	16.1032	2.6	175	49.7512	6.21891	22.8	22.8	0	0	0	0	0	1	1	0	1	1	0	0	0	0	0	0	0	0	0	0	0	1	0	0	0	0	0	0	0	1	1	0	0	1			0	0
205	0	1	67	38.6	14.7081	2.9	93	51.8135	6.47668	19.1	19.1	1	0	0	0	1	0	1	0	0	0	1	0	0	1	0	0	1	1	0	0	1	0	0	0	0	0	0	0	0	0	0	0	0	1			1	0
206	0	0	50	43.5	18.1061	3.8	83	45.977	6.89655	20.5	20.5	1	0	1	0	0	0	0	0	0	0	0	1	0	0	0	0	1	0	0	0	0	0	1	0	0	0	0	0	0	0	0	0	0	1	1	0	1	0
207	0	0	72	47.5	18.5547	2.7	86	52.6316	6.31579	16.7	16.7	1	0	0	0	0	0	0	0	0	0	0	1	0	0	0	0	1	1	0	0	1	0	0	0	0	0	0	0	1	0	0	0	0	1	1	0	1	0
208	0	1	68	47.1	17.5333	2.5	132	53.0786	6.36943	20.3	20.3	0	0	0	0	0	0	0	0	1	0	0	0	0	0	0	1	0	0	0	0	0	0	0	0	0	0	0	0	0	0	0	0	0	-	-		0	0
209	0	0	39	48	17.8901	1.9	187	52.0833	6.25	25	25	0	0	0	0	0	0	0	0	1	0	0	0	0	0	0	0	0	0	1	1	0	0	0	0	0	0	0	0	0	0	0	0	0	1			0	0
210	0	0	39	48	17.8901	1.9	202	52.0833	6.25	26.7	26.7	0	0	0	0	0	0	0	0	1	0	0	0	0	0	0	0	1	1	0	0	1	0	0	0	0	0	0	0	1	0	0	0	0	1	1	0	1	0
211	0	0	53	43.5	19.3333	2.2	113.2	45.977	6.89655	10.1	10.1	0	0	0	0	0	0	1	0	0	0	1	0	0	0	0	0	1	1	1	0	1	0	0	0	0	0	0	0	1	0	0	0	0	1	1	0	1	0
212	0	1	72	42.9	17.1413	2.9	93	46.62	6.99301	24.2	24.2	0	0	1	0	0	0	0	1	1	0	0	0	0	0	0	1	1	1	0	0	1	0	0	0	0	0	0	0	1	0	0	0	0	0	0	1	1	0
213	0	0	78	38.6	17.1556	2.7	64	51.8135	6.47668	13.9	13.9	0	0	0	0	0	0	0	0	1	0	0	1	0	0	0	0	1	0	0	0	0	1	0	0	0	0	0	0	0	0	0	0	0	1	1	0	1	0
214	0	1	75	47.2	16.6243	2.5	65	52.9661	6.35593	18	18	0	0	0	0	0	0	0	0	1	0	0	0	0	0	0	0	1	0	0	0	0	0	0	0	1	0	0	0	0	0	0	0	0	1	1	0	1	0
215	0	0	75	38	19.3878	4	89	52.6316	6.57895	15.4	19.4	1	0	0	0	0	0	1	0	0	0	1	1	0	0	0	0	1	1	0	0	1	0	0	0	0	0	0	0	1	0	0	0	0	0	0	0	1	0
216	0	0	83	48.1	22.2592	1.8	92	51.9751	6.23701	22.8	22.8	0	0	1	0	0	0	0	0	1	0	0	1	0	0	0	0	0	0	0	0	0	0	0	1	0	0	0	0	0	0	0	0	0	-	-		0	0
217	0	0	59	46	18.1955	4.5	88	43.4783	6.52174	24.6	24.6	0	0	0	0	0	0	0	0	0	0	0	0	0	0	0	0	0	0	0	0	0	0	0	0	0	0	0	0	0	0	0	0	0	-	-		1	0
218	0	1	73	49.6	22.798	2.1	92	50.4032	6.04839	16.3	16.3	0	0	0	1	1	0	0	0	1	0	1	0	0	1	0	1	1	1	1	0	1	0	0	0	0	0	0	0	1	0	0	0	1	0	0	1	1	0
219	0	0	37	46.3	18.7837	2.7	80	53.9957	6.47948	25.7	25.7	0	0	0	0	0	1	0	0	0	0	0	1	0	0	0	0	0	0	0	0	0	1	0	0	0	0	0	0	0	0	0	0	0	1			0	1
220	0	0	27	40	18.2615	4	99	50	6.25	27.5	27.5	0	0	0	0	0	0	0	0	0	0	0	0	0	0	0	0	0	0	0	0	0	0	0	0	0	0	0	0	0	0	0	0	0	-	-		1	0
221	0	1	73	47.1	18.6072	2.3	52	42.4628	3.18471	10.7	10.7	0	0	0	0	0	0	1	0	1	0	1	1	0	0	0	0	1	1	1	0	1	0	0	0	0	0	0	0	1	0	0	0	0	1	1	0	1	0
222	0	1	49	38.2	12.8824	2.6	83	52.356	6.5445	22.3	22.3	0	0	0	0	0	0	0	0	1	0	0	0	0	0	0	1	1	1	0	0	1	0	0	0	0	0	0	0	1	0	0	0	0	1	1	0	1	0
223	0	0	52	47.1	16.589	2.7	89	53.0786	6.36943	13.5	13.5	0	0	0	0	0	1	0	0	0	0	0	1	0	0	0	0	0	0	0	1	0	0	0	0	0	0	0	0	0	0	0	0	0	-	-		0	0
224	0	1	71	46.5	17.6095	2.5	95	53.7634	6.45161	23.3	23.3	0	0	0	0	0	0	0	0	1	0	0	0	0	1	0	1	1	1	0	0	0	0	0	1	0	0	0	0	1	0	0	0	0	1	1	0	1	0
225	0	0	63	30	12.6497	1.9	60	50	6.66667	8.7	8.7	0	0	0	0	0	0	0	1	1	1	0	1	0	0	0	1	0	0	1	0	0	0	0	0	0	0	0	0	0	0	0	0	0	-	-		0	0
226	0	1	75	49.4	17.3991	2.2	62	50.6073	6.07287	19.1	19.1	0	0	0	0	0	0	0	1	0	1	0	0	0	0	0	0	0	0	0	0	0	1	0	0	0	0	0	0	0	0	0	0	0	1			0	0
227	0	1	75	49.2	21.7795	2.9	93	50.813	7.11382	19.2	19.2	1	0	0	0	0	1	0	0	0	1	0	0	0	0	0	0	0	0	0	1	0	0	0	0	0	0	0	0	0	0	0	0	0	1			0	0
228	0	0	28	45.1	19.1159	3.2	123	44.3459	6.65188	16.6	16.6	0	0	0	0	0	0	0	0	0	0	0	0	0	0	0	0	0	0	0	0	0	0	0	0	0	0	0	0	0	0	0	0	0	-	-		0	0
229	0	0	74	49.1	21.5341	2.3	89	50.9165	7.12831	20.1	20.1	1	0	0	0	1	0	1	0	0	1	1	0	0	0	0	0	1	1	1	0	1	0	0	0	0	0	0	0	1	0	1	0	0	1	1	0	1	0
230	0	0	77	45.5	20.2222	2.4	96	49.4505	6.59341	13.8	13.8	0	0	0	0	0	0	1	0	0	0	1	1	0	0	0	0	0	0	1	0	0	0	0	0	0	0	0	0	0	0	0	0	0	-	-		0	0
231	0	1	71	48.4	17.6492	3.2	98	51.6529	7.2314	16.1	16.1	0	0	1	0	0	0	0	0	1	0	0	1	0	0	0	0	0	0	0	1	0	0	0	0	0	0	0	0	0	0	0	0	0	1			0	0
232	0	1	25	41.8	16.3281	3.7	98	47.8469	7.17703	19.6	19.6	0	0	0	0	0	0	1	0	0	0	0	0	0	0	1	0	0	0	0	1	0	0	0	0	0	0	0	0	0	0	0	0	0	1			0	0
233	0	0	39	42	17.3695	2	98	47.619	7.14286	12.2	12.2	0	0	0	0	0	1	0	0	0	0	0	1	0	0	0	0	0	0	0	0	0	1	0	0	0	0	0	0	0	0	0	0	0	1			0	0
234	0	0	39	42.8	17.7004	2.5	111	52.5701	7.00935	20.7	20.7	0	0	0	0	0	1	0	0	0	1	0	1	0	1	0	0	0	0	0	0	0	0	0	0	0	0	0	0	0	0	0	0	0	-	-		0	0
235	0	1	56	42.3	15.7272	1.9	120	53.1915	7.0922	14	14	0	0	0	0	0	0	0	0	1	0	0	0	0	0	0	1	0	0	0	0	1	0	0	0	0	0	0	0	0	0	0	0	0	1			0	0
236	0	0	66	49.5	21.3405	4.3	92	50.5051	7.07071	23.1	23.1	0	0	0	0	0	0	0	0	0	0	0	0	0	0	0	0	0	0	0	0	0	0	0	0	0	0	0	0	0	0	0	0	0	-	-		1	0
237	0	1	48	49.8	18.5158	3.2	70	50.2008	6.0241	19.8	19.8	0	0	0	0	0	1	0	0	1	0	0	0	0	0	0	0	0	0	0	0	0	0	0	0	0	0	0	0	0	0	0	0	0	-	-		0	0
238	0	0	68	27.6	12.6004	2.6	95	54.3478	7.24638	20.7	20.7	0	0	0	0	0	0	0	0	0	1	0	0	0	0	0	0	0	0	0	1	0	0	0	0	0	0	0	0	0	0	0	0	0	1			0	1
239	0	1	74	49	16.1844	2.1	65.6	51.0204	7.14286	15.5	15.5	1	0	0	0	0	0	0	0	0	0	0	0	0	1	0	0	1	1	0	0	1	0	0	0	0	0	0	0	1	0	0	0	0	1	1	0	1	0
240	0	1	74	49	16.1844	2.5	65.6	51.0204	7.14286	17.3	17.3	1	0	0	0	0	0	0	0	0	0	0	0	0	1	0	0	1	1	0	0	1	0	0	0	0	0	0	0	1	0	0	0	0	1	1	0	1	0
241	0	0	52	43.1	18.1734	2.5	110	46.4037	6.96056	19.5	19.5	0	0	0	0	0	1	0	0	0	1	0	1	0	0	0	0	0	0	0	0	0	0	0	0	0	0	0	0	0	0	0	0	0	-	-		0	0
242	0	0	53	44.8	17.8103	2.9	83	44.6429	6.69643	22.2	22.2	0	0	0	0	0	0	0	0	1	0	0	0	0	0	0	0	0	0	0	0	0	0	0	0	1	0	0	0	0	0	0	0	0	1	1		0	0
243	0	1	67	45.1	17.399	2.5	70	44.3459	6.65188	28.5	28.5	0	0	0	0	0	0	0	0	1	0	0	0	0	0	0	1	0	0	0	0	0	0	1	0	0	0	0	0	0	0	0	0	0	1			0	0
244	0	0	74	37.3	17.6919	2.5	96.8	53.6193	6.70241	15.3	15.3	1	0	1	0	0	0	0	0	1	0	0	0	0	0	0	0	0	0	0	0	0	0	1	0	0	0	0	0	0	0	0	0	0	1			0	1
245	0	1	70	67	22.6474	3	74	44.7761	5.97015	21.5	21.5	1	0	0	0	0	0	0	1	0	0	0	0	0	0	0	0	0	0	0	0	0	0	0	0	0	0	0	0	0	0	0	0	0	-	-		0	0
246	0	0	78	78.8	35.0222	3	63	50.7614	6.34518	27.6	24.5	0	0	1	0	0	1	0	0	1	0	0	0	0	0	0	0	1	1	0	0	1	0	0	0	0	0	0	0	1	0	0	0	0	1	1	0	1	0
247	0	0	61	54.7	27.2041	2.8	61	50.2742	7.31261	28.3	28.3	1	0	1	0	0	0	0	0	0	0	0	0	0	0	0	0	1	0	0	0	0	0	0	0	0	1	0	0	0	0	0	0	0	1	1	0	1	0
248	0	0	74	61	24.3734	2.6	89	49.1803	6.55738	18.5	18.5	1	0	0	0	0	0	0	0	1	0	0	0	0	0	0	1	0	0	1	1	0	0	0	0	0	0	0	0	0	0	0	0	0	1	0		0	0
249	0	1	68	62.3	20.8159	3	83	48.1541	6.42055	22.6	22.6	0	0	0	0	0	0	0	0	1	0	0	1	0	0	0	0	1	0	0	0	0	0	1	0	0	0	0	0	0	0	0	0	0	1	0	0	1	0
250	0	0	84	63	26.9127	2.6	74	47.619	6.34921	9	9	1	0	0	0	0	0	1	0	0	0	1	1	0	0	0	0	0	0	1	0	0	0	0	0	0	0	0	0	0	0	0	0	0	-	-		0	0
251	0	1	48	55	20.9572	2.2	76	54.5455	7.27273	26.7	26.7	0	0	0	0	0	1	0	0	1	0	0	0	0	0	0	0	0	0	0	0	0	1	0	0	0	0	0	0	0	0	0	0	0	1	1		0	0
252	0	1	49	55.2	21.0334	2.4	73	45.2899	6.34058	22.1	22.1	0	0	0	0	0	1	0	0	1	1	0	1	0	0	0	0	0	0	0	1	0	0	0	0	0	0	0	0	0	0	0	0	0	0	1		0	0
253	0	1	52	55.5	20.1894	2.1	130	45.045	6.30631	15.4	15.4	0	0	0	0	0	0	0	1	0	0	0	0	0	0	0	0	0	0	0	0	0	1	0	0	0	0	0	0	0	0	0	0	0	0	0		0	0
254	0	0	76	52	25.4291	2.4	62	48.0769	6.73077	25.6	25.6	1	0	0	0	0	0	0	0	0	0	1	0	0	0	0	0	0	0	1	1	0	0	0	0	0	0	0	0	0	0	0	0	0	-	-		0	0
255	0	1	78	55.2	20.2755	2.4	67	54.3478	7.24638	17.2	17.2	0	0	0	1	0	0	0	1	0	0	0	1	0	1	0	0	0	0	0	0	0	0	0	1	0	0	0	0	0	0	0	0	0	1	1		0	0
256	0	1	48	60	23.4375	2.5	133	50	6.66667	16.1	16.1	1	0	0	0	0	0	1	0	1	0	1	1	0	0	0	0	1	0	1	0	0	0	1	0	0	0	0	0	0	0	0	0	0	0	1	0	1	0
257	0	1	74	50.6	17.928	2.2	100	49.4071	6.917	26.2	26.2	1	0	1	1	0	0	0	0	0	1	0	0	0	1	0	0	0	0	0	0	1	0	0	0	0	0	0	0	0	0	0	0	0	-	-		0	0
258	0	0	57	60.8	24.6036	2	64	49.3421	6.57895	25.1	25.1	0	0	0	0	0	1	0	0	0	0	0	1	0	1	0	0	0	0	0	0	0	0	0	0	0	0	0	0	0	0	0	0	0	0	0		0	0
259	0	1	73	59.9	23.3984	4	65	50.0835	6.6778	28.4	28.4	0	0	0	0	0	0	0	0	0	0	0	0	0	0	0	0	0	0	0	0	0	0	0	0	0	0	0	0	0	0	0	0	0	-	-		1	0
260	0	1	71	58.2	19.446	3.1	62	51.5464	6.87285	17.4	17.4	1	0	1	0	0	0	0	0	0	0	0	1	0	0	0	0	0	0	0	0	0	0	0	0	0	0	0	0	0	0	0	0	0	-	-		0	0
261	0	1	58	70.1	24.9855	2.8	92	42.796	5.70613	15.7	15.7	0	0	1	0	0	0	0	0	1	0	0	1	0	0	0	0	0	0	0	0	0	1	0	0	0	0	0	0	0	0	0	0	0	1			0	0
262	0	1	77	57.1	22.4166	2.9	86	52.5394	7.00525	24.7	24.7	0	0	1	0	0	0	0	1	1	0	0	0	0	0	0	0	0	0	0	0	0	0	0	0	0	0	0	0	0	0	1	1	1	0	0		0	0
263	0	0	70	57	21.1927	3.4	88	43.8596	6.14035	22.5	22.5	1	0	0	1	0	0	0	0	0	0	0	1	0	0	1	0	0	0	0	0	0	0	0	0	0	0	0	0	0	0	0	0	0	0	1		0	0
264	0	1	29	82.1	26.2058	5	107	48.7211	6.09013	31.4	31.4	0	0	0	0	0	0	0	0	0	0	0	0	0	0	0	0	0	0	0	0	0	0	0	0	0	0	0	0	0	0	0	0	0	-	-		1	0
265	0	1	72	53.6	20.3985	4.2	68	46.6418	6.52985	22	22	1	0	0	0	0	0	0	0	0	0	0	1	0	0	0	0	0	0	0	0	0	0	0	0	0	0	0	0	0	0	0	0	0	-	-		0	0
266	0	1	68	66.1	23.3087	3.4	78	45.3858	6.05144	22	22	0	0	1	0	0	0	0	0	1	0	0	1	0	0	0	0	0	0	0	1	0	0	0	0	0	0	0	0	0	0	0	0	0	1			0	0
267	0	0	38	56	19.7941	2.6	95	53.5714	7.14286	21.7	21.7	0	0	0	0	0	1	0	0	0	1	0	1	0	0	0	0	0	0	0	1	0	0	0	0	0	0	0	0	0	0	0	0	0	1	1		0	0
268	0	1	49	52.3	16.5068	2.7	90	47.8011	6.69216	23.1	23.1	1	0	0	0	0	0	0	0	1	0	0	0	0	0	0	0	1	1	0	0	1	0	0	0	0	0	0	0	0	0	0	0	0	1			1	0
269	0	1	49	56.5	17.8323	2.7	79	53.0973	7.07965	26.9	34.6	1	0	0	0	0	0	0	0	1	0	0	0	0	0	0	0	1	1	0	0	1	0	0	0	0	0	0	0	1	0	0	0	0	1	1	0	1	0
270	0	1	45	58.3	17.5427	3.4	77	51.458	6.86106	20.1	20.1	0	0	0	0	0	1	0	0	0	0	0	0	0	0	0	0	0	0	0	1	0	0	0	0	0	0	0	0	0	0	0	0	0	1			0	0
271	0	1	69	72.2	24.1796	3.1	64	48.4765	6.23269	29.8	23.9	0	0	1	0	1	0	1	0	1	0	1	0	0	1	0	0	1	1	1	0	1	0	0	0	0	0	0	0	0	0	0	0	0	1			1	0
272	0	1	69	72.2	24.1796	2.6	118	48.4765	6.23269	23.1	23.1	0	0	1	0	1	0	1	0	1	0	1	0	0	1	0	0	1	1	1	0	1	0	0	0	0	0	0	0	0	0	0	0	0	1			1	0
273	0	0	79	57.7	25.3731	2.5	82.7	51.9931	6.93241	15.3	15.3	0	0	0	0	0	0	1	0	1	1	0	0	0	1	0	1	1	1	1	0	1	0	0	0	0	0	0	0	1	0	0	0	0	0	0	1	1	0
274	0	1	79	62.2	21.7779	2.8	75	48.2315	6.43087	22.5	22.5	1	0	0	1	0	0	1	1	0	0	1	0	0	0	0	0	1	1	1	0	1	0	0	0	0	0	0	0	1	0	0	0	0	1	1	0	1	0
275	0	1	79	62.2	21.7779	2.4	100	48.2315	6.43087	16.8	16.8	1	0	0	1	0	0	1	1	0	0	1	0	0	1	0	0	1	1	1	0	1	0	0	0	0	0	0	0	0	0	0	0	0	1			1	0
276	0	1	76	61.5	22.4532	2.7	84	48.7805	6.50407	13	13	0	0	0	0	0	0	0	0	1	0	0	0	0	0	0	0	0	0	0	0	0	1	0	0	0	0	0	0	0	0	0	0	0	1			0	1
277	0	0	18	57.9	22.9026	3.1	143	51.8135	6.90846	16.2	16.2	0	0	0	0	0	0	0	0	0	1	0	0	0	0	0	0	0	0	0	1	0	0	0	0	0	0	0	0	0	0	0	0	0	1			0	0
278	0	1	82	54.1	19.6327	3	82	55.4529	6.4695	16.7	16.7	0	0	0	0	0	0	0	0	1	0	0	1	0	1	0	0	1	0	0	0	0	1	0	0	1	0	0	0	0	0	0	0	0	0	1	0	1	0
279	0	1	41	52.5	18.2734	3.2	72	47.619	6.66667	24.8	24.8	0	0	0	0	0	1	0	1	0	1	0	0	0	0	0	0	1	1	0	1	0	0	0	0	0	0	0	0	1	0	0	0	0	1	1	0	1	0
280	0	1	42	60.9	21.1972	2.7	112	49.2611	6.56814	25.7	25.7	0	0	0	0	0	1	0	1	0	1	0	0	0	0	0	0	0	0	0	1	0	0	0	0	0	0	0	0	0	0	0	0	0	1			0	0
281	0	1	42	63.9	22.2414	3.5	85	46.9484	6.25978	30.8	30.8	0	0	0	0	0	1	0	1	0	1	0	0	0	0	0	0	0	0	0	1	0	0	0	0	0	0	0	0	0	0	0	0	0	1			0	0
282	0	0	63	71.1	32.6803	3.2	81	49.2264	5.62588	18.8	18.8	1	0	0	0	0	0	1	0	0	0	0	1	0	0	0	0	0	0	1	0	0	0	0	0	0	0	0	0	0	0	0	0	0	-	-		0	0
283	0	1	71	67	23.7387	2.1	82	52.2388	5.97015	17.8	14.8	0	0	0	0	0	0	0	0	0	0	0	1	0	0	0	0	1	1	0	1	0	0	0	1	0	0	0	0	1	0	0	0	0	0	0	0	1	0
284	0	0	74	50.3	23.2773	3.1	76	49.7018	6.95825	24.2	24.2	0	0	0	0	0	0	0	0	0	0	0	0	0	0	0	0	0	0	0	0	0	1	0	0	0	0	0	0	0	0	0	0	0	1	1		0	0
285	0	1	45	73.5	24.5581	3.8	136	51.0204	6.12245	16.7	16.7	0	0	0	0	0	0	0	0	0	0	0	0	0	0	0	0	0	0	0	1	0	0	0	1	0	0	0	0	0	0	0	0	0	1			0	1
286	0	1	80	65.3	24.2787	2.6	65	45.9418	6.12557	22.8	22.8	1	0	1	0	0	0	0	0	0	0	0	1	0	0	0	0	1	1	0	0	0	0	0	1	0	0	0	0	1	0	0	0	0	1	0	0	1	0
287	0	1	63	60.6	20.9689	2.8	95	49.505	6.60066	24	24	1	0	0	0	0	0	0	0	0	0	0	0	0	0	0	0	0	0	0	0	0	0	0	0	0	0	0	0	0	0	0	0	0	1			0	0
288	0	1	62	63	21.7993	2.1	95	47.619	6.34921	15.8	15.8	1	0	0	0	0	0	0	0	0	0	0	0	0	0	0	0	0	0	0	1	0	0	0	0	0	0	0	0	0	0	0	0	0	1	0		0	0
289	0	0	52	51	18.7328	2.5	62	49.0196	6.86275	22.6	22.6	0	0	0	0	0	1	0	0	0	0	0	0	0	0	0	0	0	0	0	1	0	0	0	0	0	0	0	0	0	0	0	0	0	1			0	1
290	0	1	67	66.7	23.9162	3.7	69	44.9775	5.997	25	25	1	0	0	0	0	0	0	0	1	0	0	0	0	0	0	0	1	1	0	0	0	0	0	1	0	0	0	0	1	0	0	0	0	1	1	0	1	0
291	0	1	52	57	23.7253	2	118	52.6316	7.01754	20.9	20.9	0	0	0	0	0	0	0	1	1	0	0	0	0	0	1	0	1	1	0	1	0	0	0	1	0	0	0	0	0	0	0	0	0	0	0		1	0
292	0	1	74	55.7	19.4331	2	76	53.86	7.18133	15.1	15.1	0	0	0	0	0	0	0	0	1	0	0	1	0	0	0	0	0	0	0	0	0	1	0	0	0	0	0	0	0	0	0	0	0	1			0	0
293	0	1	73	62	24.5243	2	67	48.3871	6.45161	19.6	19.6	0	0	1	0	0	0	0	1	1	0	0	0	0	0	0	0	1	1	1	0	1	0	0	0	0	0	0	0	1	0	0	0	0	1	1	0	1	0
294	0	0	47	52.9	20.0825	4.7	72	47.259	6.61626	27.2	27.2	0	0	0	0	0	1	0	0	0	0	0	0	0	0	0	0	0	0	0	1	0	0	0	0	0	0	0	0	0	0	0	0	0	0			0	0
295	0	0	46	54.1	20.5381	3.7	114	55.4529	6.4695	23	23	0	0	0	0	0	1	0	0	0	0	0	0	0	0	0	0	0	0	0	1	0	0	0	0	0	0	0	0	0	0	0	0	0	1			0	0
296	0	0	46	54.2	20.5761	3.7	120	55.3506	6.45756	23.2	23.2	0	0	0	0	0	1	0	0	0	1	0	0	0	0	0	0	0	0	0	1	0	0	0	0	0	0	0	0	0	0	0	0	0	1			0	0
297	0	1	62	56	19.4457	2.1	106	53.5714	7.14286	22.7	22.7	0	0	0	0	0	0	0	0	1	0	0	0	0	0	0	0	1	1	0	0	1	1	0	0	0	0	0	0	1	0	0	0	0	1	1	0	1	0
298	0	1	82	59.6	22.0249	2	99	50.3356	6.71141	19	19	0	0	0	1	0	0	0	0	0	0	0	0	0	1	1	0	0	0	0	0	0	0	0	0	0	0	0	0	0	0	0	0	0	-	-		0	0
299	0	1	66	57.3	17.9837	3.1	78	52.356	6.9808	24.8	24.8	0	0	0	0	0	0	0	0	1	0	0	0	0	0	0	1	0	0	0	1	0	0	0	0	0	0	0	0	0	0	0	0	0	1			0	0
300	0	1	72	61.5	23.4339	3.3	73	48.7805	6.50407	24.3	24.3	1	0	0	0	0	0	0	0	0	0	0	1	0	0	0	0	1	1	0	0	1	0	0	0	0	0	0	0	1	0	0	0	0	1	1	0	1	0
301	0	1	57	57	17.1327	2.5	147	52.6316	7.01754	15	15	0	0	0	0	0	1	0	0	0	0	0	0	0	0	0	0	0	0	0	0	0	1	0	0	0	0	0	0	0	0	0	0	0	1			0	0
302	0	0	44	52.4	21.1237	2.3	125	47.7099	6.67939	15.7	15.7	0	0	0	0	0	0	0	0	1	0	0	1	0	0	0	0	0	0	0	0	1	0	0	0	0	0	0	0	0	0	0	0	0	1			0	0
303	0	1	38	60.5	20.6901	2.6	140	49.5868	6.61157	15	15	0	0	0	0	0	1	0	0	0	0	0	1	0	0	0	0	0	0	0	0	0	1	0	0	0	0	0	0	0	0	0	0	0	1			0	0
304	0	1	69	58	22.2925	1.4	120	51.7241	6.89655	12.6	12.6	0	0	1	0	0	0	0	0	1	0	0	0	0	0	0	0	0	0	0	0	0	0	0	0	0	0	0	0	0	0	0	0	0	-	-		0	0
305	0	1	71	60	24.3418	2.8	72	50	6.66667	29.8	29.8	0	0	0	0	0	0	0	0	1	0	0	1	0	0	0	0	1	0	0	0	0	1	0	0	0	0	0	0	0	0	0	0	0	1			1	0
306	0	1	75	53.4	18.6968	2.6	61	56.1798	6.55431	21	21	1	0	0	1	0	0	0	0	0	0	0	0	0	1	1	0	0	0	0	1	0	0	0	0	0	0	0	0	0	0	0	0	0	-	-		0	0
307	0	1	79	61.6	21.3149	2.5	118	48.7013	6.49351	17.1	17.1	0	0	0	0	1	0	0	0	1	0	0	0	0	0	0	0	0	0	0	0	0	0	0	0	0	0	0	0	0	0	0	0	0	-	-		0	0
308	0	1	45	60.2	21.304	2.1	96	49.8339	6.64452	17.6	17.6	0	0	0	0	0	1	0	0	0	1	0	0	0	1	1	0	0	0	0	0	0	0	0	0	0	0	0	0	0	0	0	0	0	-	-		0	0
309	0	1	45	51	17.3397	2.6	156	49.0196	6.86275	19.4	19.4	0	0	0	0	0	0	0	0	1	0	0	0	0	0	0	1	1	1	0	1	0	0	0	0	0	0	0	0	1	0	0	0	0	1	1	0	1	0
310	0	0	51	50.6	19.84	1.9	151	49.4071	6.917	21.7	21.7	0	0	0	0	0	0	0	0	1	1	0	0	0	0	0	1	0	0	0	1	0	0	0	0	0	0	0	0	0	0	0	0	0	1			0	1
311	0	1	49	52.3	17.0776	2.3	119	47.8011	6.69216	14.9	14.9	0	0	0	0	0	1	0	0	0	1	0	1	0	0	0	0	1	1	0	1	0	0	0	0	0	0	0	0	1	0	0	0	0	1	1	0	1	0
312	0	1	87	62.2	23.6422	2	66	48.2315	6.43087	12.4	12.4	0	0	0	0	0	0	0	0	1	0	0	0	0	0	0	0	0	0	0	1	0	0	0	0	0	0	0	0	0	0	0	0	0	0			0	0
313	0	1	59	66.8	27.1005	2.7	114	44.9102	5.98802	19.8	19.8	0	0	0	1	0	0	1	0	0	1	0	1	0	0	0	0	0	0	0	0	0	1	0	0	0	0	0	0	0	0	0	0	0	1			0	0
314	0	1	67	70	24.2215	2.6	68	42.8571	5.71429	30.1	30.1	1	0	0	0	0	0	0	0	0	0	1	0	0	0	0	0	0	0	0	1	0	0	0	0	0	0	0	0	0	0	0	0	0	1			0	0
315	0	1	83	79.35	27.7826	2.1	107	44.1084	6.3012	14.3	14.3	0	1	0	0	0	0	1	0	1	0	0	1	0	0	0	0	0	0	0	0	0	1	0	0	0	0	0	0	0	0	0	0	0	0			0	1
316	0	1	77	59.6	23.2812	2.2	66.5	50.3356	6.71141	22.9	22.9	1	0	1	0	1	0	1	0	0	1	1	1	0	1	0	0	0	0	1	0	1	0	0	0	0	0	0	0	0	0	0	0	0	-	-		0	0
317	0	0	53	64.9	25.0376	2.8	62	46.225	6.16333	21	21	1	0	0	0	0	0	1	0	0	0	1	1	0	0	0	0	0	0	1	0	0	0	0	0	0	0	0	0	0	0	0	0	0	1			0	0
318	0	1	64	75	25.3515	3.8	105	53.3333	6.66667	16.9	16.9	0	0	1	0	0	0	0	0	1	0	0	1	0	0	0	0	0	0	0	0	0	0	0	1	0	0	0	0	0	0	0	0	0	1			0	0
319	0	0	21	54.5	19.7303	3.1	105	55.0459	6.42202	23.3	23.3	0	0	0	0	0	0	0	0	0	0	0	0	0	0	0	0	1	0	0	0	0	0	1	0	0	0	0	0	0	0	0	0	0	1	1	0	1	0
320	0	1	28	60.9	21.0727	3.5	87	49.2611	6.56814	21.4	21.4	0	0	0	0	0	1	0	0	0	0	0	1	0	0	0	0	0	0	0	0	0	0	0	0	0	0	0	0	0	0	0	0	0	-	-		0	0
321	0	1	72	55.7	21.2239	2	66	53.86	7.18133	22.1	22.1	1	0	0	0	0	0	0	1	1	0	0	0	0	0	0	0	0	0	0	0	0	0	0	0	0	0	0	0	0	0	0	0	0	-	-		0	0
322	0	1	52	57.5	20.5436	2.6	70	52.1739	6.95652	22.3	22.3	0	0	0	0	0	1	0	0	0	0	0	0	0	0	0	0	0	0	0	1	0	0	0	0	0	0	0	0	0	0	0	0	0	1			0	0
323	0	0	78	51.8	21.9843	2.6	106	48.2625	6.75676	22.4	22.4	0	0	1	0	0	0	0	0	1	0	0	0	0	0	0	0	0	0	0	1	0	1	0	0	0	0	0	0	0	0	0	0	0	1			0	0
324	0	1	70	71.2	23.517	2.1	68	49.1573	5.61798	15.8	15.8	0	0	1	0	0	0	0	1	1	0	0	1	0	0	0	0	0	0	0	0	0	1	0	0	0	0	0	0	0	0	0	0	0	1			0	0
325	0	1	50	60.8	19.6281	2.9	103	49.3421	6.57895	19	19	0	0	0	0	0	0	0	0	1	0	0	0	0	0	0	1	1	0	0	0	0	0	1	0	0	0	0	0	0	0	0	0	0	1	1	0	1	0
326	0	1	44	66.7	20.8171	2.5	114	44.9775	5.997	15.6	12.5	1	0	0	1	0	0	1	0	0	0	0	0	0	1	0	0	0	0	0	0	0	0	0	1	0	0	0	0	0	0	0	0	1	-	-		0	0
327	0	0	54	59	24.685	3.3	74	50.8475	6.77966	21.9	21.9	0	0	0	0	0	0	0	0	1	0	0	0	0	0	0	0	0	0	0	0	0	0	0	0	0	0	0	0	0	0	0	0	0	-	-		1	0
328	0	1	68	53.9	19.7262	2.2	145	55.6586	6.49351	10.6	10.6	0	0	0	0	0	0	1	0	1	0	0	1	0	1	0	0	0	0	0	1	0	0	0	0	0	0	0	0	0	0	0	0	0	1			0	0
329	0	1	65	62.3	19.2284	2.3	160	48.1541	6.42055	14.9	14.9	0	0	1	0	0	0	0	1	1	0	0	0	0	0	0	0	0	0	0	0	0	1	0	0	0	0	0	0	0	0	0	0	0	1			0	0
330	0	0	55	84.5	35.7692	2.7	79	47.3373	5.91716	28	28	0	0	0	0	0	0	0	0	0	0	0	1	0	0	0	0	0	0	0	0	0	0	0	0	0	0	0	0	0	0	0	0	0	-	-		0	0
331	0	0	32	61.4	19.2705	2.9	96	48.8599	6.51466	17.9	17.9	0	0	0	0	0	1	0	0	0	1	0	0	0	1	0	0	0	0	0	1	0	0	0	0	0	0	0	0	0	0	0	0	0	1			0	0
332	0	1	64	66.3	21.7234	1.9	119	45.2489	6.03318	14.3	14.3	0	0	0	0	0	0	0	1	1	0	0	1	0	0	0	0	1	0	0	0	0	0	1	0	0	0	0	0	0	0	0	0	0	1	1	0	1	0
333	0	1	75	61.4	21.2457	3.2	66	48.8599	6.51466	22.2	22.2	1	0	1	0	0	0	0	0	0	0	0	1	0	0	0	0	0	0	0	0	0	0	0	0	0	0	0	0	0	0	0	0	0	-	-		0	0
334	0	1	59	52.1	18.3283	2.7	96	47.9846	6.71785	9.5	9.5	0	0	0	0	0	0	0	0	1	0	0	1	0	0	0	0	0	0	0	0	0	1	0	0	0	0	0	0	0	0	0	1	1	-	-		0	0
335	0	0	23	50.2	19.0575	2.4	112	49.8008	6.97211	12.2	12.2	0	0	0	0	0	1	0	0	0	1	0	0	0	0	0	1	0	0	0	0	0	0	0	0	0	0	0	0	0	0	0	0	0	-	-		0	0
336	0	1	73	60.7	22.5684	2.3	60	49.4234	6.58979	14.4	14.4	1	0	0	0	0	0	0	0	0	0	0	1	0	0	0	0	0	0	0	0	0	0	0	0	0	0	0	0	0	0	0	0	0	-	-		0	0
337	0	1	65	56.1	22.4724	2.6	76	53.4759	7.13012	25.9	25.9	1	0	0	1	0	0	0	1	0	0	0	0	0	1	1	0	0	0	0	1	0	0	0	0	0	0	0	0	0	0	0	0	0	1			0	0
338	0	0	65	57	22.5466	2.6	72	52.6316	7.01754	22.7	22.7	0	0	0	0	0	0	0	0	1	0	0	0	0	0	0	0	0	0	0	1	0	0	0	0	0	0	0	0	0	0	0	0	0	1			0	0
339	0	1	40	61	22.1902	3.4	122	49.1803	6.55738	15.6	15.6	0	0	0	0	0	1	0	0	0	0	0	1	0	1	0	0	0	0	0	1	0	0	0	0	0	0	0	0	0	0	0	0	0	1			0	1
340	0	0	74	51	20.5593	2.8	102	49.0196	6.86275	15	15	1	0	0	0	0	0	0	0	0	0	0	1	0	0	0	0	0	0	0	0	0	0	0	0	0	0	0	0	0	0	0	0	0	-	-		0	0
341	0	1	70	57.7	21.1938	3	108	51.9931	6.93241	17.5	17.5	1	0	0	0	0	1	0	0	1	0	0	1	0	1	0	0	0	0	1	1	0	0	0	0	0	0	0	0	0	0	0	0	0	1			0	0
342	0	1	58	50.4	17.0362	1.5	88	49.6032	6.94444	18.3	18.3	0	0	0	0	0	0	0	1	1	0	0	0	0	0	0	0	0	0	0	0	0	1	0	0	0	0	0	0	0	0	0	0	0	1			0	0
343	0	1	65	68.6	23.4602	2.2	144	51.0204	5.8309	11.4	11.4	0	0	1	0	1	0	0	0	1	0	0	1	0	0	0	0	0	0	0	1	0	0	0	0	0	0	0	0	0	0	0	0	0	1			0	0
344	0	0	49	56.5	19.7822	3	128	53.0973	7.07965	14.6	14.6	0	0	0	0	0	1	0	0	0	0	0	0	0	0	0	0	0	0	0	0	0	1	0	0	0	0	0	0	0	0	0	0	0	-	-		0	0
345	0	0	74	60	24.974	2.5	102	50	6.66667	17.8	17.8	0	0	0	0	0	0	0	0	0	1	0	1	0	0	0	0	0	0	1	1	0	0	0	0	0	0	0	0	0	0	0	0	0	1			0	0
346	0	0	48	93.6	36.4713	1.4	149	42.735	6.41026	15.9	15.9	0	0	0	0	0	0	0	0	1	0	0	0	0	0	0	1	1	0	1	0	0	1	0	0	0	0	0	0	0	0	0	0	0	1	1	0	1	0
347	0	1	82	63.2	24.0817	2.4	76	47.4684	6.32911	24.3	19.4	0	0	0	0	0	0	0	0	1	0	0	0	0	0	0	0	0	0	0	0	0	1	0	0	0	0	0	0	0	0	0	0	0	1			0	0
348	0	0	78	52.6	27.2243	2.3	153	47.5285	6.65399	12.6	12.6	1	0	0	0	0	0	1	1	0	0	1	1	0	0	0	0	0	0	1	0	0	0	1	0	0	0	0	0	0	0	0	0	0	-	-		0	0
349	0	1	66	71.1	24.0333	2.6	117	49.2264	6.32911	17.2	17.2	0	0	0	0	0	0	0	0	1	0	0	1	0	0	0	0	0	0	0	0	0	1	0	0	0	0	0	0	0	0	0	0	0	-	-		0	0
350	0	1	53	60.2	21.203	2.6	75	49.8339	6.64452	15.8	15.8	0	0	0	0	0	1	0	0	0	1	0	1	0	0	0	0	0	0	0	1	0	0	0	0	0	0	0	0	0	0	0	0	0	1			0	1
351	0	0	52	73	28.8754	4.9	63	47.9452	5.47945	29.4	29.4	0	0	0	0	0	0	0	0	0	0	0	0	0	0	0	0	0	0	0	0	0	0	0	0	0	0	0	0	0	0	0	0	0	-	-		1	0
352	0	1	19	55.4	17.4852	3.3	96	49.639	7.22022	21.9	21.9	0	0	0	0	0	1	0	0	0	0	0	0	0	0	1	0	0	0	0	1	0	0	0	0	0	0	0	0	0	0	0	0	0	1			0	0
353	0	1	66	63.6	23.2199	2.5	87	47.1698	6.28931	14	14	0	0	0	0	0	1	0	0	0	0	0	1	0	0	0	0	0	0	0	1	0	0	0	0	0	0	0	0	0	0	0	0	0	1			0	0
354	0	1	30	60.7	20.1646	2.8	105	49.4234	6.58979	19.7	19.7	0	0	0	0	0	0	1	0	1	0	0	0	0	1	1	1	0	0	0	1	0	0	0	0	0	0	0	0	0	0	0	0	0	1			0	0
355	0	1	50	58.5	21.0263	2.2	89	51.2821	6.83761	12.2	12.2	1	0	0	0	0	0	1	0	0	0	1	0	0	0	0	0	0	0	0	0	1	0	0	0	0	0	0	0	0	0	0	0	0	1			0	1
356	0	0	71	58.1	23.7825	3.6	96	51.6351	6.88468	27.8	27.8	0	0	0	0	0	0	0	0	0	0	0	0	0	0	0	0	0	0	0	0	0	0	0	0	0	0	0	0	0	0	0	0	0	-	-		1	0
357	0	0	78	52.5	24.9703	2.8	129	47.619	6.66667	16.5	16.5	0	0	1	0	0	0	0	0	1	0	0	1	0	0	0	0	0	0	0	0	0	1	0	0	0	0	0	0	0	0	0	0	0	1			0	0
358	0	1	64	57.2	21.6615	3.1	82	52.4476	6.99301	20.5	20.5	0	0	0	0	0	0	0	0	1	0	0	1	0	0	0	0	0	0	0	0	0	0	0	0	0	0	0	0	0	0	0	0	0	-	-		0	0
359	0	0	70	70	25.9312	2.7	68	50	5.71429	32.5	32.5	0	0	0	0	0	0	0	0	0	0	1	0	0	0	0	0	0	0	1	0	0	0	0	0	0	0	0	0	0	0	0	0	0	-	-		0	0
360	0	0	84	68.3	32.6651	2.8	76	51.2445	5.85652	27.7	27.7	1	0	0	0	0	0	1	0	0	0	1	0	0	0	0	0	0	0	1	1	0	0	0	0	0	0	0	0	0	0	0	0	0	1			0	0
361	0	1	47	58.1	18.2962	2.7	124	51.6351	6.88468	17.4	17.4	0	0	0	0	0	1	0	0	0	1	0	0	0	1	0	0	0	0	0	1	0	0	0	0	1	0	0	0	0	0	0	0	0	1	1		0	0
362	0	0	67	75	28.578	2.6	65	53.3333	6.66667	21.7	21.7	1	0	0	0	0	0	1	0	0	0	1	1	0	0	0	0	0	0	1	0	1	0	0	0	0	0	0	0	0	0	0	0	0	-	-		0	0
363	0	1	67	54	20.8325	3.4	64	55.5556	6.48148	26.9	26.9	0	0	0	0	0	0	0	0	1	0	0	0	0	0	0	1	0	0	0	0	0	1	0	0	0	0	0	0	0	0	0	0	0	1			0	0
364	1	0	76	43.8	20.8323	2.2	49	45.6621	4.56621	11	11	0	0	0	0	0	0	0	0	1	0	0	0	0	1	0	1	0	0	1	1	0	0	0	0	0	0	0	0	0	0	0	0	0	0	0	0	0	0
365	1	0	58	55.6	23.1426	2.9	21	44.0647	6.29496	33	33	1	1	0	0	0	0	0	0	0	0	0	1	1	1	1	0	0	0	0	0	0	0	0	0	0	0	0	0	0	0	0	0	0	1	1	0	0	0
366	1	1	89	53	19.2336	1.5	103	56.6038	6.60377	23.6	23.6	0	0	0	0	0	0	0	1	1	1	0	0	0	0	0	0	0	0	0	0	0	1	0	0	0	0	0	0	0	1	1	0	0	1	1	0	0	0
367	1	0	80	48.2	24.5918	2.7	37	49.7925	5.18672	21.1	21.1	1	0	0	0	0	0	1	0	0	0	1	1	0	0	0	0	0	0	1	0	0	0	0	0	0	0	0	0	0	0	0	0	0	0	0	0	0	0
368	1	1	75	63	21.2953	2.1	43	47.619	4.7619	21.8	21.8	1	0	0	0	0	0	1	1	0	0	1	1	0	0	0	0	1	1	1	0	1	0	0	0	0	0	0	0	1	1	1	0	0	1	1	0	1	0
369	1	0	50	35.9	14.3444	2.3	72	55.7103	6.96379	23	23	0	0	0	0	0	1	0	0	0	1	0	0	0	0	0	0	0	0	0	1	0	0	0	0	0	0	0	0	0	0	0	0	0	1	1	0	0	1
370	1	0	45	65.3	24.6682	2.5	71	61.2557	6.12557	26.6	26.6	0	0	0	0	0	0	0	0	1	0	0	1	0	0	0	1	1	0	0	0	0	0	1	0	0	0	0	0	0	0	0	0	0	1	1	0	1	0
371	1	1	74	62.5	22.4103	2.3	77	60	6.4	27	27	1	0	0	0	0	0	0	0	0	0	0	1	1	1	1	0	0	0	0	0	0	1	0	0	0	0	0	0	0	0	0	0	0	1	1	0	0	0
372	1	0	75	60	23.4375	2.3	24	44.1667	6.66667	11.3	17.1	1	0	0	0	0	0	1	0	0	0	1	1	0	0	0	0	0	0	1	0	0	0	0	0	0	0	0	0	0	0	0	0	0	0	0	0	0	0
373	1	1	51	56.5	17.8323	2.5	96	61.9469	7.07965	33.2	33.2	1	0	0	0	0	0	0	0	1	0	0	0	0	0	0	0	1	1	0	0	1	0	0	0	0	0	0	0	1	0	0	0	0	1	1	0	1	0
374	1	1	51	57.1	18.0217	2.4	101	61.296	7.00525	32.9	32.9	1	0	0	0	0	0	0	0	1	0	0	0	0	0	0	0	1	1	0	0	1	0	0	0	0	0	0	0	0	0	0	0	0	0	0	0	1	0
375	1	1	51	72.5	22.8822	3.6	131	55.1724	6.89655	27.4	27.4	0	0	0	0	0	0	0	0	0	0	0	1	0	0	0	0	1	0	0	0	0	1	0	0	0	0	0	0	0	0	0	0	0	1	1	0	1	0
376	1	1	52	63.4	23.8331	2.1	77	63.0915	6.30915	19.6	26.4	0	0	0	0	0	0	0	0	0	0	0	0	0	0	0	0	1	1	0	0	0	0	0	0	0	0	0	1	1	0	0	0	0	0	0	0	1	0
377	1	1	37	51.8	19.959	3.1	81	57.9151	6.75676	20.6	20.6	0	0	0	0	0	1	0	0	0	1	0	0	0	0	0	0	0	0	0	1	0	0	0	0	0	0	0	0	0	0	0	0	0	0	0	0	0	0
378	1	1	84	58.7	21.5611	1.9	56	47.7002	5.11073	12.9	12.9	1	0	0	0	0	0	1	0	1	0	0	0	0	0	0	0	1	1	1	1	1	0	0	0	0	0	0	0	0	0	0	0	0	0	0	1	1	0
379	1	1	70	58.8	21.3384	2.5	63	59.5238	6.80272	24.6	24.6	0	0	0	0	0	0	0	0	1	0	0	0	0	0	0	0	0	0	0	0	0	1	0	0	0	0	0	0	0	0	0	0	0	1	1	0	0	0
380	1	0	80	56.5	24.136	1.8	16	44.2478	7.07965	26.2	37.6	1	1	1	0	0	0	0	0	0	0	0	0	0	0	0	0	1	0	1	0	0	0	1	0	0	0	0	0	0	0	1	0	0	1	1	0	1	0
381	1	1	69	46	17.3134	3.3	56	52.1739	4.34783	21.2	21.2	1	1	0	0	0	0	1	0	1	0	0	0	0	0	0	0	0	0	0	1	0	0	0	0	0	0	0	0	0	0	0	0	0	1	1	0	0	0
382	1	0	48	58.3	23.6521	3.3	24	42.8816	6.86106	40.6	40.6	0	1	0	0	0	1	0	0	0	1	0	0	0	0	0	0	0	0	0	1	0	0	0	0	0	0	0	0	0	0	0	0	0	1	0	0	0	0
383	1	0	79	82.4	40.5217	2.8	69	60.6796	6.06796	31.7	31.7	1	0	1	0	0	0	0	0	0	0	0	0	0	0	0	0	0	0	0	0	0	0	0	1	0	0	0	0	0	0	0	0	0	1	1	0	0	0
384	1	0	79	41.3	18.855	2.8	129	60.5327	7.26392	13.3	13.3	1	0	1	0	0	1	0	0	0	0	0	0	0	1	0	0	0	0	0	1	0	0	0	0	0	0	0	0	0	0	0	0	0	1	1	0	0	0
385	1	1	69	61.8	20.8897	2.4	123	64.7249	6.47249	32.4	32.4	1	0	1	0	0	0	0	0	0	0	0	0	0	0	0	0	1	1	0	0	1	0	0	0	0	0	0	0	1	0	0	0	0	1	1	0	1	0
386	1	1	69	70.7	23.8981	2.2	106	56.5771	7.07214	27.8	38.7	1	0	1	0	0	0	0	0	0	0	0	0	0	0	0	0	1	1	0	0	1	0	0	0	0	0	0	0	0	0	0	0	0	1	1	0	1	0
387	1	1	67	48.8	18.144	2.5	54	49.1803	5.12295	13.7	16.4	1	0	0	0	0	0	1	0	0	0	1	1	0	0	0	0	0	0	1	0	0	0	0	0	0	0	0	0	0	0	1	0	0	-	-	0	0	0
388	1	1	67	67.6	26.242	2.5	12	41.4201	5.91716	28.1	28.1	1	1	1	0	1	0	0	1	1	1	1	0	0	1	0	0	1	1	1	0	1	0	0	0	0	0	0	0	1	0	0	0	0	0	0	0	1	0
389	1	1	66	60.2	22.7976	3.5	71	62.2924	6.64452	33.2	33.2	0	0	0	0	0	0	0	0	1	0	0	0	0	0	0	1	1	0	0	0	0	0	1	0	0	0	0	0	0	0	0	0	0	1	1	0	1	0
390	1	1	72	62	20.4783	1.4	60.1	56.4516	6.45161	25.3	25.3	0	0	1	1	1	0	0	1	1	1	0	0	0	1	0	0	1	1	0	0	1	0	0	0	0	0	0	0	1	1	1	0	0	0	0	0	1	0
391	1	1	33	51	20.3521	2.9	69	58.8235	6.86275	42.3	42.3	0	0	0	0	0	1	0	0	0	0	0	1	0	0	0	0	1	0	0	0	0	0	1	0	0	0	0	0	0	0	0	0	0	1	1	0	1	0
392	1	0	30	48.35	20.6544	3.7	87	62.0476	7.23888	32.3	32.3	0	0	0	0	0	1	0	0	0	1	0	0	0	0	0	0	0	0	0	0	0	0	0	0	0	0	0	0	0	0	0	0	0	0	0	0	0	0
393	1	0	30	40	17.0874	3.4	108	62.5	6.25	27	27	0	0	0	0	0	1	0	0	0	1	0	0	0	0	0	0	1	1	0	1	0	0	0	0	0	0	0	0	1	0	0	0	0	1	1	0	1	0
394	1	1	74	64.5	22.3183	2.4	31	49.6124	4.65116	29.1	29.1	0	1	0	0	0	0	0	1	1	0	1	0	0	0	0	0	1	1	1	0	1	0	0	0	0	0	0	0	1	0	0	0	0	1	1	0	1	0
395	1	0	67	47.3	18.4766	2.2	117	63.4249	6.34249	22.8	22.8	1	0	0	0	0	0	1	0	0	0	0	0	0	1	0	0	0	0	0	1	0	0	0	0	0	0	0	0	0	0	0	0	0	-	-	0	0	1
396	1	1	57	55.3	17.2591	2.3	40	50.6329	5.42495	24.9	24.9	0	0	0	0	0	1	0	0	0	1	0	0	0	0	0	0	0	0	0	0	0	0	0	0	0	0	0	0	0	0	0	0	0	-	-	0	0	0
397	1	1	57	57.4	17.9145	2.4	64	62.7178	6.96864	25.2	25.2	0	0	0	0	0	1	0	0	0	1	0	0	0	0	0	0	0	0	0	0	0	0	1	0	0	0	0	0	0	0	0	0	0	0	1	0	0	0
398	1	0	84	38.5	16.4467	2.2	76	58.4416	6.49351	14.7	14.7	1	0	0	1	0	0	0	1	0	0	1	1	0	0	0	0	0	0	0	0	0	0	0	0	0	0	0	0	0	0	0	0	0	1	1	0	0	0
399	1	1	58	51.8	19.0266	2.5	47	46.332	4.82625	20.8	20.8	0	0	0	0	0	1	0	0	0	1	0	0	0	0	0	0	0	0	0	1	0	0	0	0	0	0	0	0	0	0	0	0	0	1	1	0	0	0
400	1	1	58	51.4	18.8797	2.4	47	46.6926	4.86381	28.3	28.3	0	0	0	0	0	1	0	0	0	1	0	0	0	0	0	0	0	0	0	1	0	0	0	0	0	0	0	0	0	0	0	0	0	1	1	0	0	0
401	1	1	58	51.4	18.6529	2.5	42	46.6926	4.86381	27	27	0	0	0	0	0	1	0	0	0	1	0	0	0	0	0	0	1	0	0	0	0	1	0	0	0	0	0	0	0	0	0	0	0	1	1	0	1	0
402	1	1	75	38	14.7514	2.3	87.4	59.2105	6.57895	15.6	15.6	1	0	0	0	0	0	0	0	1	0	0	0	0	0	0	0	1	1	1	1	0	0	0	0	0	0	0	0	1	0	0	0	0	1	1	0	1	0
403	1	1	73	73.8	27.3722	2.9	17	43.3604	6.77507	22	22	1	1	0	0	0	0	1	0	0	0	1	1	0	0	0	0	0	0	1	0	0	0	0	0	0	0	0	0	0	0	0	0	0	-	-	0	0	0
404	1	1	76	55.3	18.1608	2.4	51	50.6329	5.42495	29.3	29.3	1	0	0	0	0	0	0	0	1	0	0	0	0	0	0	1	0	0	0	0	0	0	0	0	0	0	0	0	0	0	0	0	0	-	-	0	0	0
405	1	0	76	48	20.7756	2.5	25	43.75	6.25	37.9	37.9	0	1	1	1	0	0	0	0	0	0	1	0	0	1	1	0	0	0	1	0	0	0	0	0	0	0	0	0	0	0	0	0	0	-	-	0	0	0
406	1	1	77	54	24	2.1	72	55.5556	6.48148	16	16	1	0	0	0	0	1	0	0	0	1	0	0	0	0	0	0	0	0	0	1	0	0	0	0	0	0	0	0	0	0	0	0	0	1	1	0	0	0
407	1	1	76	55.8	20.4959	1.9	21	39.4265	7.16846	25.9	25.9	1	1	1	1	1	0	0	0	0	0	0	0	0	1	0	0	0	0	1	1	0	0	0	0	0	0	0	0	0	0	0	0	0	1	0	0	0	0
408	1	0	63	58.2	22.7344	2.5	56	48.11	5.15464	24.7	37.4	1	0	1	1	0	0	1	0	0	0	0	0	0	0	0	0	0	0	0	1	0	0	0	0	0	0	0	0	0	0	0	0	0	1	1	0	0	0
409	1	1	33	48	18.0219	2.5	19	45.8333	6.25	20.5	21.7	1	1	0	0	0	0	1	1	0	0	0	0	0	0	0	0	0	0	0	0	0	1	0	0	0	0	0	0	0	0	0	0	0	1	1	0	0	0
410	1	0	63	60.8	24.6036	2.7	71	57.5658	6.57895	32.1	32.1	1	0	0	0	0	0	1	0	0	0	0	1	0	0	0	0	0	0	0	1	0	0	0	0	0	0	0	0	0	0	0	0	0	1	1	0	0	0
411	1	1	76	42	14.881	3	69	57.1429	5.95238	22.9	22.9	0	0	0	0	0	0	0	0	1	0	0	1	0	0	0	0	1	0	0	0	0	0	1	0	0	0	0	0	0	0	0	0	0	1	1	0	1	0
412	1	1	71	54.3	21.4786	2.9	52	44.1989	5.52486	23.6	23.6	0	0	1	0	0	0	0	0	1	0	0	0	0	0	0	0	0	0	0	1	0	0	0	0	0	0	0	0	0	0	0	0	0	1	1	0	0	0
413	1	0	62	48	23.8048	2.8	75	62.5	7.29167	27.7	27.7	0	0	0	1	0	0	0	0	1	0	0	0	0	0	0	0	1	0	0	0	0	0	1	0	0	0	0	0	0	0	0	0	0	1	1	0	1	0
414	1	0	62	47.9	23.7552	3	84	62.6305	6.26305	35.8	35.8	0	0	0	1	0	0	0	0	1	0	0	0	0	0	0	0	1	0	0	0	0	1	0	0	0	0	0	0	0	0	0	0	0	1	1	0	1	0
415	1	1	60	48.6	17.6368	2	99	61.7284	7.20165	16.4	16.4	1	0	0	1	0	0	0	0	0	0	0	0	0	0	0	0	0	0	0	1	0	0	0	1	0	0	0	0	0	0	0	0	0	-	-	0	0	1
416	1	0	81	40.2	19.1201	3.2	35	49.7512	4.97512	23	23	1	0	1	0	0	0	0	0	1	0	0	0	0	0	0	0	0	0	0	0	0	0	1	0	0	0	0	0	0	0	0	0	0	1	1	0	0	0
417	1	0	83	57.7	25.9898	2.5	18	43.3276	6.93241	25	25	0	0	0	0	0	0	0	1	1	0	0	0	0	0	0	0	0	0	1	0	0	1	0	0	0	0	0	0	0	0	0	0	0	0	1	0	0	0
418	1	1	82	39.8	13.7716	2.4	67	62.8141	6.28141	25.5	25.5	0	0	0	0	0	0	0	0	1	0	0	0	0	0	0	1	1	1	1	1	1	0	0	0	0	0	0	0	1	0	0	0	0	1	1	0	1	0
419	1	0	55	35	14.1994	2.5	99	57.1429	7.14286	27.3	27.3	0	0	0	0	0	0	0	0	1	1	0	0	0	0	0	0	0	0	0	1	0	0	0	0	0	0	0	0	0	0	0	0	0	1	1	0	0	0
420	1	0	55	33.2	13.4691	2.2	75	60.241	6.0241	24.1	24.1	0	0	0	0	0	0	0	0	1	1	0	0	0	0	0	1	0	0	0	1	0	0	0	0	0	0	0	0	0	0	0	0	0	1	0	0	0	1
421	1	1	86	59	24.2439	3.1	75	59.322	6.77966	37.3	37.3	1	0	0	0	0	0	0	0	0	0	0	0	0	0	0	0	1	1	0	0	0	0	0	1	0	0	0	0	0	0	0	0	0	1	1	0	1	0
422	1	1	86	59	24.2439	3.3	64	63.5593	6.77966	31.2	31.2	1	0	0	0	0	0	0	0	0	0	0	0	0	0	0	0	1	1	0	0	0	0	0	1	0	0	0	0	1	0	0	0	0	1	0	0	1	0
423	1	1	67	68.8	25.6739	3.6	75	58.1395	5.81395	27.6	27.6	1	0	0	0	0	0	0	0	0	0	0	1	0	0	0	0	0	0	0	1	0	0	1	0	0	0	0	0	0	0	0	0	0	1	1	0	0	0
424	1	0	65	40	16.3945	2.6	69	62.5	6.25	33.3	33.3	0	0	0	0	0	0	0	0	1	0	0	0	0	0	0	1	0	0	0	1	0	0	0	0	1	0	0	0	0	0	0	0	0	1	1	0	0	0
425	1	1	61	52.7	19.3572	3.1	106	56.926	6.64137	17.1	18.1	0	0	1	0	0	0	0	0	1	0	0	0	0	0	0	0	0	0	0	1	0	1	0	0	0	0	0	0	0	0	0	0	0	1	1	0	0	0
426	1	1	57	49.9	19.6886	1.4	45	48.0962	5.01002	17.5	17.5	0	0	0	0	1	0	0	0	1	1	0	0	0	0	0	0	0	0	0	0	0	0	0	0	0	0	0	0	0	0	0	0	0	0	0	1	0	0
427	1	1	86	49.6	19.1351	3.5	65	60.4839	7.05645	33.7	33.7	0	0	0	0	0	0	0	0	1	0	0	0	0	0	0	0	0	0	0	0	0	0	0	0	0	0	0	0	0	0	0	0	0	-	-	0	0	0
428	1	1	73	67.2	23.8095	2.5	38	47.619	5.20833	24.9	24.9	0	1	0	0	0	0	0	1	0	0	0	0	1	1	1	0	0	0	0	0	0	1	0	0	0	0	0	0	0	0	0	1	1	0	1	0	0	0
429	1	1	82	84.2	30.0829	2.7	25	42.7553	7.12589	25.4	25.4	1	1	0	0	0	0	0	0	1	0	0	1	0	0	0	0	0	0	1	0	0	1	0	0	0	0	0	0	0	0	0	0	0	0	1	0	0	0
430	1	0	78	71.5	31.234	2.6	72	55.9441	6.99301	52	52	0	0	1	0	0	0	0	0	0	0	0	0	0	0	0	0	1	1	0	0	0	0	0	1	0	0	0	0	0	0	0	0	0	1	1	0	1	0
431	1	0	78	78.1	34.1172	3.3	61	60.8195	6.40205	54.1	54.1	0	0	1	0	0	0	0	0	0	0	0	0	0	0	0	0	1	1	0	0	0	0	0	1	0	0	0	0	0	0	0	0	0	1	1	0	1	0
432	1	1	77	66.7	24.2053	2.4	85	59.97	5.997	33.4	33.4	1	0	0	0	0	0	0	0	0	0	1	0	0	0	0	0	0	0	0	0	0	0	0	0	0	0	0	0	0	0	0	0	0	-	-	0	0	0
433	1	0	90	32.6	16.6327	1.9	52	49.0798	6.13497	21.1	21.1	1	0	0	0	0	0	0	0	0	0	0	0	0	0	0	0	0	0	0	0	0	1	0	0	0	0	0	0	0	1	1	0	0	0	1	0	0	0
434	1	0	53	42	17.4818	2.4	122	59.5238	7.14286	27	27	0	0	0	0	0	1	0	0	0	0	0	1	0	0	1	0	0	0	0	0	0	0	0	0	0	0	0	0	0	0	0	0	0	1	1	0	0	0
435	1	1	71	64	21.533	2.1	35	50	4.6875	17.6	17.6	1	1	0	0	0	0	1	0	1	0	0	0	0	0	0	1	0	0	0	1	0	0	0	0	0	0	0	0	0	0	0	0	0	1	0	0	0	0
436	1	1	43	91	28.5604	2.2	34	48.3516	5.49451	18.1	18.1	1	0	0	0	0	0	0	0	0	0	0	0	0	0	0	0	0	0	0	0	0	0	0	0	0	0	0	0	0	0	0	0	0	-	-	0	0	0
437	1	0	76	72.3	35.6048	2.4	63	55.325	5.5325	20.5	20.5	0	0	0	0	0	0	0	0	1	0	1	1	0	0	0	0	0	0	1	0	0	1	0	0	0	0	0	0	0	0	0	0	0	1	1	0	0	0
438	1	0	82	50.3	24.5978	4.2	76	59.6421	6.95825	32.8	32.8	0	0	1	0	0	0	0	0	0	0	0	0	0	0	0	0	0	0	0	0	0	0	0	0	0	0	0	0	0	0	0	0	0	-	-	0	1	0
439	1	1	74	48.1	16.4495	2.3	58	49.896	5.19751	24.8	24.8	0	0	0	0	0	0	0	0	1	0	0	0	0	0	0	1	0	0	1	1	0	0	0	0	0	0	0	0	0	0	0	0	0	1	1	0	0	0
440	1	1	75	56.6	20.7897	3.4	70	61.8375	7.06714	30.1	30.1	1	0	0	0	0	0	0	0	1	0	0	0	0	0	0	0	0	0	0	0	0	0	0	0	0	0	0	0	0	0	0	0	0	-	-	0	0	0
441	1	0	93	60	26.6667	2.2	32	46.6667	5	26.4	26.4	1	0	0	0	0	0	1	0	1	0	0	1	0	0	0	0	0	0	1	0	0	0	0	0	0	0	0	0	0	0	0	0	0	-	-	1	0	0
442	1	1	78	53.7	20.2115	2.7	31	52.1415	5.58659	27.7	27.7	1	0	0	0	0	0	0	0	1	0	0	0	0	0	0	1	1	0	0	0	0	0	1	0	0	0	0	0	0	0	0	0	0	1	1	0	1	0
443	1	0	69	46.4	20.0041	4.4	71	59.2672	6.46552	29.4	29.4	0	0	0	0	0	0	0	0	0	0	0	0	0	0	0	0	0	0	0	0	0	0	0	0	0	0	0	0	0	0	0	0	0	-	-	0	1	0
444	1	1	65	76.5	27.1046	3.5	51	47.0588	5.22876	27.7	27.7	1	0	1	0	0	0	1	0	0	0	1	1	0	0	0	0	0	0	0	0	0	0	0	0	0	0	0	0	0	0	0	0	0	-	-	0	0	0
445	1	1	81	54.2	19.3877	1.8	49	44.2804	5.53506	18.2	28.3	0	0	0	0	0	0	0	0	1	1	0	1	0	0	0	0	0	0	0	1	0	0	0	0	0	0	0	0	0	0	0	0	0	1	1	0	0	0
446	1	1	69	71	24.8591	2.1	77	56.338	7.04225	23	23	0	0	0	0	0	1	0	0	0	1	0	0	0	1	0	0	0	0	0	1	0	0	0	0	0	0	0	0	0	0	0	0	0	1	1	0	0	0
447	1	0	44	42.9	16.3466	2.1	68	58.2751	6.99301	20.8	20.8	0	0	0	0	0	1	0	0	0	0	0	0	0	0	0	0	0	0	0	0	0	0	0	0	0	0	0	0	0	0	0	0	0	-	-	0	0	0
448	1	1	78	58.2	21.3774	3.8	11	42.9553	6.87285	18.3	18.3	1	1	0	0	0	1	0	0	0	1	0	0	0	0	0	0	0	0	0	1	0	0	0	0	0	0	0	0	0	0	0	0	0	0	0	0	0	0
449	1	1	54	100	35.8564	2	59	48	5	26.7	26.7	1	0	0	0	0	0	1	0	0	0	1	0	0	0	0	0	1	1	1	1	0	0	0	0	0	0	0	0	1	0	0	0	0	1	0	1	1	0
450	1	0	68	64.1	26.6805	2.4	135	58.5023	6.24025	19.1	19.1	0	0	0	0	0	1	0	0	0	1	0	0	0	0	0	0	0	0	0	1	0	0	0	0	0	0	0	0	0	0	0	0	0	1	1	0	0	0
451	1	1	62	60.1	20.5533	2.3	24	41.5973	6.65557	39.8	39.8	0	1	1	0	0	0	1	0	0	0	0	0	0	0	0	0	0	0	0	0	0	0	0	0	0	0	0	0	0	0	0	0	0	-	-	0	0	0
452	1	1	65	48.5	18.3217	2.7	86	61.8557	7.21649	27.2	27.2	1	0	0	0	0	0	0	1	1	0	0	0	0	0	0	0	0	0	0	0	0	1	0	0	0	0	0	0	0	0	0	0	0	1	1	0	0	0
453	1	0	83	64	26.2985	2.8	69	62.5	6.25	25.4	25.4	1	0	1	0	0	0	1	0	1	0	1	1	0	0	0	0	1	1	1	0	1	0	0	0	0	0	0	0	0	0	0	0	0	0	1	0	1	0
454	1	1	50	73.3	23.6635	2.5	103	61.3915	6.82128	34	34	0	0	1	0	0	1	0	1	0	0	0	0	0	1	0	0	0	0	0	1	0	0	0	0	0	0	0	0	0	0	0	1	1	1	1	0	0	0
455	1	1	75	67	21.8776	1.8	123	59.7015	5.97015	16.8	19.9	0	0	1	0	0	0	1	1	0	1	1	0	0	0	0	0	1	1	1	0	1	0	0	0	0	0	0	0	1	0	1	0	1	0	0	0	1	0
456	1	1	75	67	21.8776	1.3	52	47.7612	5.22388	22.7	22.7	0	0	1	0	0	0	0	1	0	0	1	0	0	0	0	0	0	0	1	0	0	0	0	0	0	0	0	0	0	0	0	0	0	0	0	0	0	0
457	1	1	78	50.7	19.8047	3.3	9	41.4201	5.91716	32.7	32.7	1	1	0	0	0	0	1	0	0	0	0	0	0	0	0	0	1	1	0	0	1	0	0	0	0	0	0	0	1	0	0	0	0	1	1	0	1	0
458	1	0	92	50.2	23.8763	1.8	9	41.8327	5.9761	23.9	31.3	1	1	1	1	0	0	0	0	0	1	0	0	0	0	0	0	1	1	1	0	1	0	0	0	0	0	0	0	1	0	0	0	0	1	1	0	1	0
459	1	1	62	43	17.0088	3.2	193	58.1395	6.97674	19.7	19.7	0	0	0	1	0	0	0	0	0	0	0	1	0	1	0	0	1	1	0	0	0	0	0	1	0	0	0	0	0	0	0	0	0	1	1	0	1	0
460	1	1	62	43	17.0088	2.9	193	58.1395	6.97674	21.1	21.1	0	0	0	1	0	0	0	0	0	0	0	0	0	1	0	0	1	1	0	0	0	0	0	1	0	0	0	0	0	0	0	0	0	1	1	0	1	0
461	1	0	76	46.2	20.8099	3	36	51.9481	5.41126	24.7	24.7	1	1	1	0	0	0	1	0	1	0	0	1	0	0	0	0	0	0	0	0	0	0	0	0	0	0	0	0	0	0	0	0	0	0	0	0	0	0
462	1	1	68	47	16.6525	1.6	43	51.0638	5.31915	14.6	22.5	1	1	1	0	0	0	1	1	0	0	1	0	0	0	0	0	1	1	1	0	1	0	0	0	0	0	0	0	1	0	0	0	0	0	1	0	1	0
463	1	1	68	39.9	14.1369	2.1	34	50.1253	5.01253	19.8	19.8	1	1	1	0	0	0	0	1	0	0	1	0	0	0	0	0	0	0	1	1	0	0	0	0	0	0	0	0	0	0	0	0	0	1	1	0	0	0
464	1	0	83	46.8	22.2592	2.2	44	51.2821	5.34188	32.9	32.9	0	0	0	0	0	0	1	0	0	0	1	0	0	0	0	0	0	0	1	1	0	0	0	0	0	0	0	0	0	0	0	0	0	1	1	0	0	0
465	1	0	72	43	18.4654	1.8	59	46.5116	4.65116	20.7	20.7	0	0	0	0	1	1	0	0	1	1	0	0	0	0	0	0	0	0	0	0	0	0	0	0	0	0	0	0	0	0	0	0	0	0	0	0	0	0
466	1	1	62	78	26.6749	4.5	74	64.1026	6.41026	26.3	26.3	1	0	0	0	0	0	0	0	0	0	0	1	0	0	0	0	0	0	0	0	0	0	0	1	0	0	0	0	0	0	0	0	0	0	0	0	0	1
467	1	1	51	54.5	17.2011	1.9	96	55.0459	7.33945	22.1	22.1	1	0	0	0	0	0	0	0	1	0	0	0	0	0	0	0	1	1	0	0	1	0	0	0	0	0	0	0	1	0	0	0	0	1	1	0	1	0
468	1	1	60	70	25.7117	2.6	67	57.1429	5.71429	18	18	0	0	0	0	0	0	1	0	0	0	1	0	0	0	0	0	0	0	1	0	0	0	0	0	0	0	0	0	0	0	0	0	0	0	0	0	0	0
469	1	1	65	42	16.7182	1.9	140	59.5238	7.14286	19.7	19.7	0	0	1	0	0	0	0	1	0	1	0	0	0	0	0	0	0	0	0	0	0	1	0	0	0	0	0	0	0	0	0	0	0	1	1	0	0	0
470	1	0	87	53.8	23.9111	2.5	48	52.0446	5.57621	22.1	22.1	1	0	0	0	0	0	0	0	0	0	0	0	0	1	0	0	0	0	0	0	0	0	0	0	0	0	0	0	0	0	0	0	0	0	0	0	0	0
471	1	1	38	50	19.2654	3	63	60	7	24.4	24.4	0	0	0	0	0	1	0	0	0	1	0	0	0	0	0	0	0	0	0	1	0	0	0	0	0	0	0	0	0	0	0	0	0	1	1	0	0	0
472	1	1	76	40.5	15.7219	1.9	104	61.7284	6.17284	20.9	20.9	1	0	0	0	0	0	0	0	1	0	0	0	0	0	0	1	1	1	0	1	0	0	0	1	0	0	0	0	1	0	0	0	0	0	0	0	1	0
473	1	1	78	62.4	23.7769	2.8	9	42.4679	6.41026	30.1	30.1	0	1	0	0	0	0	0	0	0	0	0	0	0	0	0	0	0	0	0	0	0	0	0	0	0	0	0	0	0	0	1	0	0	0	0	0	0	0
474	1	1	69	55.5	18.7601	2.1	67	63.0631	7.20721	28.4	28.4	1	0	1	0	0	0	0	0	0	0	0	0	0	0	0	0	1	1	0	0	1	0	0	0	0	0	0	0	1	0	0	0	0	0	1	0	1	0
475	1	0	68	54.2	22.2715	2.5	51	51.6605	5.53506	24.4	24.4	1	0	0	0	0	0	0	0	0	0	0	1	0	0	0	0	0	0	0	0	0	0	0	0	0	0	0	0	0	0	0	0	0	0	0	0	0	0
476	1	1	46	49	21.0696	2.9	71	61.2245	7.14286	13	16.4	0	0	0	0	0	1	0	0	0	1	0	0	0	0	0	0	0	0	0	0	0	0	0	0	0	0	0	0	0	0	0	0	0	0	0	0	0	0
477	1	0	72	49	21.2084	3	111	61.2245	7.14286	21.1	21.1	0	0	0	0	0	0	0	0	0	1	0	0	0	0	0	0	0	0	1	1	0	0	0	0	0	0	0	0	0	0	0	0	0	1	1	0	0	0
478	1	1	79	61.6	24.8325	2.2	63	56.8182	6.49351	31.6	31.6	1	0	0	0	0	0	0	0	1	0	0	0	0	0	0	0	0	0	1	1	0	0	0	0	0	0	0	0	0	0	0	0	0	1	1	0	0	0
479	1	1	73	71.8	24.8443	2.4	50	44.5682	5.57103	17.5	17.5	1	0	1	0	0	0	0	1	1	0	0	1	0	0	0	0	1	0	0	0	0	1	0	0	0	0	0	0	0	0	0	0	0	1	1	0	1	0
480	1	0	81	42	18.7666	3.3	41	47.619	4.7619	21.1	25.1	1	0	1	0	0	0	0	0	0	0	0	0	0	0	0	0	0	0	1	1	0	0	0	1	0	0	0	0	0	0	0	0	0	1	1	0	0	0
481	1	0	33	38.3	18.292	2.7	28	45.6919	6.52742	12.9	15.4	0	0	0	0	0	0	1	0	0	0	0	1	0	0	0	0	0	0	1	0	0	1	0	0	0	0	0	0	0	0	0	0	0	1	1	0	0	0
482	1	1	87	55	21.404	1.9	16	44.5455	6.36364	17.5	17.5	1	1	0	0	0	0	1	0	1	0	1	0	0	0	0	0	0	0	1	0	0	0	0	0	0	0	0	0	0	1	1	0	0	0	0	0	0	0
483	1	1	82	71.6	25.6118	2.9	14	40.5028	6.98324	23.7	23.7	1	1	0	0	0	0	0	0	0	0	0	0	0	0	0	0	0	0	1	1	0	0	0	0	0	0	0	0	0	0	0	0	0	1	1	0	0	0
484	1	0	75	53.5	23.7778	2.3	27	45.7944	6.54206	18.9	18.9	1	1	0	0	0	0	0	0	0	0	0	0	0	0	0	0	0	0	0	0	0	0	0	0	1	0	0	0	0	0	0	0	0	0	1	0	0	0
485	1	0	54	47.2	20.4294	2.3	60	63.5593	6.35593	32.1	32.1	1	0	0	0	0	0	0	0	0	0	0	1	0	0	0	0	0	0	0	1	0	0	0	0	0	0	0	0	0	0	0	0	0	0	1	0	0	1
486	1	0	92	53.5	22.2685	2.3	71	56.0748	6.54206	24.4	24.4	1	0	0	0	0	0	0	0	0	0	0	0	0	0	0	0	1	1	0	0	1	0	0	0	0	0	0	0	1	0	0	0	0	1	1	0	1	0
487	1	1	87	42	14.5329	2.3	21	42.8571	7.14286	17.7	17.7	1	0	0	0	0	0	1	0	0	1	1	0	0	0	0	0	1	1	1	1	0	0	0	0	0	0	0	0	1	0	0	0	0	1	0	1	1	0
488	1	1	78	54	23.6832	1.7	71	64.8148	6.48148	18.7	18.7	1	0	0	0	0	0	1	0	1	0	1	0	0	1	0	0	0	0	1	1	0	0	0	0	0	0	0	0	0	0	0	0	0	1	1	0	0	0
489	1	1	78	57	22.4336	2.4	44	49.1228	5.26316	27.6	27.6	1	0	0	0	0	0	1	0	0	0	0	1	0	0	0	0	0	0	0	0	0	0	0	0	0	0	0	0	0	0	0	0	0	0	0	0	0	0
490	1	1	57	54.1	20.3621	1.6	48	51.756	5.54529	28.8	28.8	0	0	1	1	0	0	0	0	0	0	0	0	0	1	0	0	0	0	0	1	0	0	0	0	0	0	0	0	0	0	0	0	0	0	0	0	0	1
491	1	1	75	50	18.3655	2.3	42	48	5	24	24	0	0	0	0	0	0	0	0	1	0	0	0	0	0	0	1	1	1	0	1	0	0	0	1	0	0	0	0	1	0	0	0	0	1	1	0	1	0
492	1	1	64	58.9	20.9935	2	57	47.5382	5.09338	23.5	23.5	0	0	0	0	1	0	0	0	1	0	0	0	0	0	0	1	0	0	0	0	1	0	0	0	0	0	0	0	0	0	0	0	0	0	1	0	0	0
493	1	1	63	47.5	17.0318	1.9	72	63.1579	6.31579	19.3	19.3	0	0	0	0	0	0	0	0	1	1	0	0	0	0	0	1	0	0	1	0	0	0	0	0	0	0	0	0	0	0	0	0	0	0	0	0	0	0
494	1	1	69	84.2	31.8864	2.6	16	42.7553	7.12589	24.3	24.3	1	1	1	0	0	0	0	1	0	1	0	1	0	0	0	0	0	0	1	0	0	0	0	0	0	0	0	0	0	0	0	0	0	0	0	0	0	0
495	1	1	70	63.9	23.5281	2.6	44	50.0782	4.69484	26.6	27	1	0	0	0	0	0	0	0	1	0	0	1	0	0	0	0	0	0	0	0	0	1	0	0	0	0	0	0	0	0	0	0	0	1	1	0	0	0
496	1	0	57	54.5	23.4039	2.5	65	55.0459	7.33945	28.8	28.8	1	0	0	1	0	0	0	0	0	0	0	1	0	1	0	0	0	0	0	0	0	0	0	0	0	0	0	0	0	0	0	0	0	0	0	0	0	0
497	1	1	77	50	18.6583	1	60	60	7	15.9	15.9	1	0	1	0	0	0	0	1	1	1	0	0	0	0	0	0	0	0	1	0	0	1	0	0	0	0	0	0	0	1	1	0	0	0	0	1	0	0
498	1	1	76	57.9	23.1934	2.6	38	48.3592	5.18135	27.7	27.7	0	0	1	0	0	0	0	1	1	0	0	0	0	0	0	0	0	0	0	1	0	1	0	0	0	0	0	0	0	0	1	0	0	1	1	0	0	0
499	1	1	76	63.4	25.3966	1.6	20	44.164	6.30915	41.6	41.6	0	0	1	0	0	0	0	1	1	0	0	0	0	1	0	0	0	0	1	1	0	1	0	0	0	0	0	0	0	1	1	0	0	1	1	1	0	0
500	1	0	66	38.6	15.9634	2	30	51.8135	5.18135	20.5	20.5	1	1	0	0	1	0	0	0	0	0	0	0	0	0	0	0	1	1	0	0	1	0	0	0	0	0	0	0	1	0	0	1	1	1	0	0	1	0
501	1	0	52	40.2	16.5187	2.1	75	62.1891	6.21891	26.7	26.7	0	0	0	0	0	0	0	0	1	0	0	0	0	0	0	0	0	0	0	0	0	1	0	0	0	0	0	0	0	0	0	0	0	1	0	0	0	1
502	1	0	43	39.5	15.5656	2.7	61	63.2911	6.32911	27.8	34	0	0	0	0	0	0	0	0	1	0	0	0	0	0	0	0	0	0	0	0	0	1	0	0	0	0	0	0	0	0	0	0	0	1	1	0	0	0
503	1	1	77	37.5	13.5759	2.4	62	60	6.66667	25	25	0	0	0	0	0	0	0	0	1	0	0	0	0	0	0	1	0	0	1	1	0	0	0	0	0	0	0	0	0	0	0	0	0	1	0	0	0	1
504	1	1	75	71.1	26.1157	3.3	70	56.2588	7.03235	29	38.3	0	0	0	0	0	0	0	0	0	0	0	0	0	0	0	0	1	1	0	0	0	0	0	1	0	0	0	0	0	0	0	0	0	1	1	0	1	0
505	1	1	68	63.7	22.8132	2.3	55	47.0958	4.70958	25.4	25.4	1	0	1	0	0	0	0	1	1	0	0	0	0	0	0	0	0	0	0	0	0	1	0	0	0	0	0	0	0	0	1	0	0	0	1	0	0	0
506	1	1	39	65	21.7181	4.5	136	61.5385	6.15385	26.4	26.4	0	0	0	0	0	0	0	0	0	0	0	0	0	0	0	0	0	0	0	0	0	0	0	0	0	0	0	0	0	0	0	-	-	-	-	0	1	0
507	1	1	66	77.4	25.2735	2.6	60	58.1395	6.45995	23.1	23.1	0	0	0	0	0	0	0	0	1	0	0	1	0	0	0	0	0	0	0	0	0	0	0	0	0	0	0	0	0	0	0	0	0	0	0	0	0	0
508	1	1	61	65	23.3067	2.4	74	61.5385	6.15385	28.3	28.3	0	0	0	0	0	0	1	0	1	0	1	0	0	0	0	1	1	1	0	0	1	0	0	0	0	0	0	0	0	0	0	0	0	1	1	0	1	0
509	1	1	35	61.7	20.3792	2.8	82	60.778	6.48298	28	31.4	0	0	0	0	0	0	0	0	1	1	1	1	0	1	1	1	0	0	1	0	0	0	0	0	0	0	0	0	0	0	0	0	0	1	1	0	0	0
510	1	1	66	55.1	19.0657	2.7	60	63.5209	7.25953	24.4	24.4	1	0	0	0	0	0	1	0	0	1	1	0	0	0	0	0	0	0	1	0	0	0	0	0	0	0	0	0	0	0	0	0	0	0	0	0	0	0
511	1	1	36	63.6	21.7503	4	87	55.0314	6.28931	27	27	0	0	0	0	0	0	0	0	0	0	0	0	0	0	0	0	0	0	0	0	0	0	0	0	0	0	0	0	0	0	0	0	0	-	-	0	1	0
512	1	1	57	55.9	21.3528	2.8	73	62.6118	7.15564	25.5	25.5	1	0	0	1	0	0	0	0	0	0	0	0	0	0	0	0	0	0	0	0	0	0	0	0	0	0	0	0	0	0	0	0	0	1	0	0	0	0
[truncated: 7 more columns]
